# Supplementary material for: An update on the distribution of Glossina (tsetse flies) at the wildlife-human-livestock interface of Akagera National Park, Rwanda
Source: Parasit Vectors. 2021 Jun 2;14:294. doi: 10.1186/s13071-021-04786-3 (PMC8173956; doi:10.1186/s13071-021-04786-3)
Supplement: Supplementary file 1 — Additional file 1: Detailed data set for entomological survey. [file 13071_2021_4786_MOESM1_ESM.xlsx]

## Sheet: Data set
Area	District	Sector	Ecosystem	Locality	Site	Season	Month	Fly catch	Species	Sex	Occurrence	Co-existence (Gp+Gmc)	Other biting flies on site	Longitude	Latitude	Vegetation type on site
AKAGERA			Swampy (Lakeshore)	Shakani	ANP1	Dry	June	204	Gp	M	yes	yes	Tabanids	30.7381	-1.78511	Dense thickets , Lacustrine, Swampy
AKAGERA			Swampy (Lakeshore)	Shakani	ANP1	Dry	June	409	Gp	F	yes	yes
AKAGERA			Swampy (Lakeshore)	Shakani	ANP1	Dry	June	56	Gmc	M	yes	yes
AKAGERA			Swampy (Lakeshore)	Shakani	ANP1	Dry	June	136	Gmc	F	yes	yes
AKAGERA			Swampy (Lakeshore)	Shakani	ANP1	Dry	July	81	Gp	M	yes	yes
AKAGERA			Swampy (Lakeshore)	Shakani	ANP1	Dry	July	154	Gp	F	yes	yes
AKAGERA			Swampy (Lakeshore)	Shakani	ANP1	Dry	July	49	Gmc	M	yes	yes
AKAGERA			Swampy (Lakeshore)	Shakani	ANP1	Dry	July	53	Gmc	F	yes	yes
AKAGERA			Swampy (Lakeshore)	Shakani	ANP1	Dry	August	117	Gp	M	yes	yes
AKAGERA			Swampy (Lakeshore)	Shakani	ANP1	Dry	August	182	Gp	F	yes	yes
AKAGERA			Swampy (Lakeshore)	Shakani	ANP1	Dry	August	58	Gmc	M	yes	yes
AKAGERA			Swampy (Lakeshore)	Shakani	ANP1	Dry	August	77	Gmc	F	yes	yes
AKAGERA			Swampy (Lakeshore)	Shakani	ANP1	Wet	March	193	Gp	M	yes	yes
AKAGERA			Swampy (Lakeshore)	Shakani	ANP1	Wet	March	266	Gp	F	yes	yes
AKAGERA			Swampy (Lakeshore)	Shakani	ANP1	Wet	March	57	Gmc	M	yes	yes
AKAGERA			Swampy (Lakeshore)	Shakani	ANP1	Wet	March	96	Gmc	F	yes	yes
AKAGERA			Swampy (Lakeshore)	Shakani	ANP1	Wet	April	676	Gp	M	yes	yes
AKAGERA			Swampy (Lakeshore)	Shakani	ANP1	Wet	April	941	Gp	F	yes	yes
AKAGERA			Swampy (Lakeshore)	Shakani	ANP1	Wet	April	154	Gmc	M	yes	yes
AKAGERA			Swampy (Lakeshore)	Shakani	ANP1	Wet	April	332	Gmc	F	yes	yes
AKAGERA			Swampy (Lakeshore)	Shakani	ANP1	Wet	May	147	Gp	M	yes	yes
AKAGERA			Swampy (Lakeshore)	Shakani	ANP1	Wet	May	244	Gp	F	yes	yes
AKAGERA			Swampy (Lakeshore)	Shakani	ANP1	Wet	May	71	Gmc	M	yes	yes
AKAGERA			Swampy (Lakeshore)	Shakani	ANP1	Wet	May	118	Gmc	F	yes	yes
AKAGERA			Swampy (Lakeshore)	Murambi	ANP2	Dry	June	122	Gp	M	yes	yes	Tabanids	30.7407	-1.78511	Woodland
AKAGERA			Swampy (Lakeshore)	Murambi	ANP2	Dry	June	186	Gp	F	yes	yes
AKAGERA			Swampy (Lakeshore)	Murambi	ANP2	Dry	June	13	Gmc	M	yes	yes
AKAGERA			Swampy (Lakeshore)	Murambi	ANP2	Dry	June	52	Gmc	F	yes	yes
AKAGERA			Swampy (Lakeshore)	Murambi	ANP2	Dry	July	129	Gp	M	yes	yes
AKAGERA			Swampy (Lakeshore)	Murambi	ANP2	Dry	July	235	Gp	F	yes	yes
AKAGERA			Swampy (Lakeshore)	Murambi	ANP2	Dry	July	22	Gmc	M	yes	yes
AKAGERA			Swampy (Lakeshore)	Murambi	ANP2	Dry	July	42	Gmc	F	yes	yes
AKAGERA			Swampy (Lakeshore)	Murambi	ANP2	Dry	August	83	Gp	M	yes	yes
AKAGERA			Swampy (Lakeshore)	Murambi	ANP2	Dry	August	129	Gp	F	yes	yes
AKAGERA			Swampy (Lakeshore)	Murambi	ANP2	Dry	August	31	Gmc	M	yes	yes
AKAGERA			Swampy (Lakeshore)	Murambi	ANP2	Dry	August	48	Gmc	F	yes	yes
AKAGERA			Swampy (Lakeshore)	Murambi	ANP2	Wet	March	352	Gp	M	yes	yes
AKAGERA			Swampy (Lakeshore)	Murambi	ANP2	Wet	March	599	Gp	F	yes	yes
AKAGERA			Swampy (Lakeshore)	Murambi	ANP2	Wet	March	29	Gmc	M	yes	yes
AKAGERA			Swampy (Lakeshore)	Murambi	ANP2	Wet	March	96	Gmc	F	yes	yes
AKAGERA			Swampy (Lakeshore)	Murambi	ANP2	Wet	April	536	Gp	M	yes	yes
AKAGERA			Swampy (Lakeshore)	Murambi	ANP2	Wet	April	988	Gp	F	yes	yes
AKAGERA			Swampy (Lakeshore)	Murambi	ANP2	Wet	April	192	Gmc	M	yes	yes
AKAGERA			Swampy (Lakeshore)	Murambi	ANP2	Wet	April	204	Gmc	F	yes	yes
AKAGERA			Swampy (Lakeshore)	Murambi	ANP2	Wet	May	219	Gp	M	yes	yes
AKAGERA			Swampy (Lakeshore)	Murambi	ANP2	Wet	May	483	Gp	F	yes	yes
AKAGERA			Swampy (Lakeshore)	Murambi	ANP2	Wet	May	139	Gmc	M	yes	yes
AKAGERA			Swampy (Lakeshore)	Murambi	ANP2	Wet	May	72	Gmc	F	yes	yes
AKAGERA			Swampy (Lakeshore)	Nyampeki	ANP3	Dry	June	116	Gp	M	yes	yes	Tabanids	30.7312	-1.7134	Dense thickets , Lacustrine, Swampy
AKAGERA			Swampy (Lakeshore)	Nyampeki	ANP3	Dry	June	183	Gp	F	yes	yes
AKAGERA			Swampy (Lakeshore)	Nyampeki	ANP3	Dry	June	39	Gmc	M	yes	yes
AKAGERA			Swampy (Lakeshore)	Nyampeki	ANP3	Dry	June	54	Gmc	F	yes	yes
AKAGERA			Swampy (Lakeshore)	Nyampeki	ANP3	Dry	July	98	Gp	M	yes	yes
AKAGERA			Swampy (Lakeshore)	Nyampeki	ANP3	Dry	July	151	Gp	F	yes	yes
AKAGERA			Swampy (Lakeshore)	Nyampeki	ANP3	Dry	July	36	Gmc	M	yes	yes
AKAGERA			Swampy (Lakeshore)	Nyampeki	ANP3	Dry	July	61	Gmc	F	yes	yes
AKAGERA			Swampy (Lakeshore)	Nyampeki	ANP3	Dry	August	77	Gp	M	yes	yes
AKAGERA			Swampy (Lakeshore)	Nyampeki	ANP3	Dry	August	107	Gp	F	yes	yes
AKAGERA			Swampy (Lakeshore)	Nyampeki	ANP3	Dry	August	42	Gmc	M	yes	yes
AKAGERA			Swampy (Lakeshore)	Nyampeki	ANP3	Dry	August	53	Gmc	F	yes	yes
AKAGERA			Swampy (Lakeshore)	Nyampeki	ANP3	Wet	March	559	Gp	M	yes	yes
AKAGERA			Swampy (Lakeshore)	Nyampeki	ANP3	Wet	March	678	Gp	F	yes	yes
AKAGERA			Swampy (Lakeshore)	Nyampeki	ANP3	Wet	March	179	Gmc	M	yes	yes
AKAGERA			Swampy (Lakeshore)	Nyampeki	ANP3	Wet	March	307	Gmc	F	yes	yes
AKAGERA			Swampy (Lakeshore)	Nyampeki	ANP3	Wet	April	963	Gp	M	yes	yes
AKAGERA			Swampy (Lakeshore)	Nyampeki	ANP3	Wet	April	1343	Gp	F	yes	yes
AKAGERA			Swampy (Lakeshore)	Nyampeki	ANP3	Wet	April	309	Gmc	M	yes	yes
AKAGERA			Swampy (Lakeshore)	Nyampeki	ANP3	Wet	April	485	Gmc	F	yes	yes
AKAGERA			Swampy (Lakeshore)	Nyampeki	ANP3	Wet	May	442	Gp	M	yes	yes
AKAGERA			Swampy (Lakeshore)	Nyampeki	ANP3	Wet	May	717	Gp	F	yes	yes
AKAGERA			Swampy (Lakeshore)	Nyampeki	ANP3	Wet	May	312	Gmc	M	yes	yes
AKAGERA			Swampy (Lakeshore)	Nyampeki	ANP3	Wet	May	392	Gmc	F	yes	yes
AKAGERA			Savannah	Buhira	ANP4	Dry	June	22	Gp	M	yes	yes	Tabanids	30.7196	-1.6201	woodland
AKAGERA			Savannah	Buhira	ANP4	Dry	June	47	Gp	F	yes	yes
AKAGERA			Savannah	Buhira	ANP4	Dry	June	5	Gmc	M	yes	yes
AKAGERA			Savannah	Buhira	ANP4	Dry	June	13	Gmc	F	yes	yes
AKAGERA			Savannah	Buhira	ANP4	Dry	July	6	Gp	M	yes	yes
AKAGERA			Savannah	Buhira	ANP4	Dry	July	11	Gp	F	yes	yes
AKAGERA			Savannah	Buhira	ANP4	Dry	July	1	Gmc	M	yes	yes
AKAGERA			Savannah	Buhira	ANP4	Dry	July	4	Gmc	F	yes	yes
AKAGERA			Savannah	Buhira	ANP4	Dry	August				no
AKAGERA			Savannah	Buhira	ANP4	Dry	August	7	Gp	F	yes	no
AKAGERA			Savannah	Buhira	ANP4	Dry	August				no
AKAGERA			Savannah	Buhira	ANP4	Dry	August				no
AKAGERA			Savannah	Buhira	ANP4	Wet	March	29	Gp	M	yes	yes
AKAGERA			Savannah	Buhira	ANP4	Wet	March	44	Gp	F	yes	yes
AKAGERA			Savannah	Buhira	ANP4	Wet	March	23	Gmc	M	yes	yes
AKAGERA			Savannah	Buhira	ANP4	Wet	March	31	Gmc	F	yes	yes
AKAGERA			Savannah	Buhira	ANP4	Wet	April	56	Gp	M	yes	yes
AKAGERA			Savannah	Buhira	ANP4	Wet	April	82	Gp	F	yes	yes
AKAGERA			Savannah	Buhira	ANP4	Wet	April	24	Gmc	M	yes	yes
AKAGERA			Savannah	Buhira	ANP4	Wet	April	57	Gmc	F	yes	yes
AKAGERA			Savannah	Buhira	ANP4	Wet	May	32	Gp	M	yes	yes
AKAGERA			Savannah	Buhira	ANP4	Wet	May	59	Gp	F	yes	yes
AKAGERA			Savannah	Buhira	ANP4	Wet	May	27	Gmc	M	yes	yes
AKAGERA			Savannah	Buhira	ANP4	Wet	May	48	Gmc	F	yes	yes
AKAGERA			Swampy (Lakeshore)	Gishanju	ANP5	Dry	June	73	Gp	M	yes	yes	Tabanids	30.7247	-1.56752	woodland, Lacustrine, Swampy
AKAGERA			Swampy (Lakeshore)	Gishanju	ANP5	Dry	June	104	Gp	F	yes	yes
AKAGERA			Swampy (Lakeshore)	Gishanju	ANP5	Dry	June	30	Gmc	M	yes	yes
AKAGERA			Swampy (Lakeshore)	Gishanju	ANP5	Dry	June	46	Gmc	F	yes	yes
AKAGERA			Swampy (Lakeshore)	Gishanju	ANP5	Dry	July	93	Gp	M	yes	yes
AKAGERA			Swampy (Lakeshore)	Gishanju	ANP5	Dry	July	110	Gp	F	yes	yes
AKAGERA			Swampy (Lakeshore)	Gishanju	ANP5	Dry	July	34	Gmc	M	yes	yes
AKAGERA			Swampy (Lakeshore)	Gishanju	ANP5	Dry	July	78	Gmc	F	yes	yes
AKAGERA			Swampy (Lakeshore)	Gishanju	ANP5	Dry	August	75	Gp	M	yes	yes
AKAGERA			Swampy (Lakeshore)	Gishanju	ANP5	Dry	August	123	Gp	F	yes	yes
AKAGERA			Swampy (Lakeshore)	Gishanju	ANP5	Dry	August	36	Gmc	M	yes	yes
AKAGERA			Swampy (Lakeshore)	Gishanju	ANP5	Dry	August	59	Gmc	F	yes	yes
AKAGERA			Swampy (Lakeshore)	Gishanju	ANP5	Wet	March	141	Gp	M	yes	yes
AKAGERA			Swampy (Lakeshore)	Gishanju	ANP5	Wet	March	208	Gp	F	yes	yes
AKAGERA			Swampy (Lakeshore)	Gishanju	ANP5	Wet	March	36	Gmc	M	yes	yes
AKAGERA			Swampy (Lakeshore)	Gishanju	ANP5	Wet	March	41	Gmc	F	yes	yes
AKAGERA			Swampy (Lakeshore)	Gishanju	ANP5	Wet	April	148	Gp	M	yes	yes
AKAGERA			Swampy (Lakeshore)	Gishanju	ANP5	Wet	April	270	Gp	F	yes	yes
AKAGERA			Swampy (Lakeshore)	Gishanju	ANP5	Wet	April	112	Gmc	M	yes	yes
AKAGERA			Swampy (Lakeshore)	Gishanju	ANP5	Wet	April	193	Gmc	F	yes	yes
AKAGERA			Swampy (Lakeshore)	Gishanju	ANP5	Wet	May	85	Gp	M	yes	yes
AKAGERA			Swampy (Lakeshore)	Gishanju	ANP5	Wet	May	136	Gp	F	yes	yes
AKAGERA			Swampy (Lakeshore)	Gishanju	ANP5	Wet	May	37	Gmc	M	yes	yes
AKAGERA			Swampy (Lakeshore)	Gishanju	ANP5	Wet	May	61	Gmc	F	yes	yes
AKAGERA			Savannah	Kabaya	ANP6	Dry	June	37	Gp	M	yes	yes	Tabanids	30.6804	-1.52564	Forest
AKAGERA			Savannah	Kabaya	ANP6	Dry	June	69	Gp	F	yes	yes
AKAGERA			Savannah	Kabaya	ANP6	Dry	June	1	Gmc	M	yes	yes
AKAGERA			Savannah	Kabaya	ANP6	Dry	June	7	Gmc	F	yes	yes
AKAGERA			Savannah	Kabaya	ANP6	Dry	July	21	Gp	M	yes	yes
AKAGERA			Savannah	Kabaya	ANP6	Dry	July	40	Gp	F	yes	yes
AKAGERA			Savannah	Kabaya	ANP6	Dry	July	8	Gmc	M	yes	yes
AKAGERA			Savannah	Kabaya	ANP6	Dry	July	20	Gmc	F	yes	yes
AKAGERA			Savannah	Kabaya	ANP6	Dry	August	15	Gp	M	yes	yes
AKAGERA			Savannah	Kabaya	ANP6	Dry	August	26	Gp	F	yes	yes
AKAGERA			Savannah	Kabaya	ANP6	Dry	August	9	Gmc	M	yes	yes
AKAGERA			Savannah	Kabaya	ANP6	Dry	August	17	Gmc	F	yes	yes
AKAGERA			Savannah	Kabaya	ANP6	Wet	March	26	Gp	M	yes	yes
AKAGERA			Savannah	Kabaya	ANP6	Wet	March	46	Gp	F	yes	yes
AKAGERA			Savannah	Kabaya	ANP6	Wet	March	13	Gmc	M	yes	yes
AKAGERA			Savannah	Kabaya	ANP6	Wet	March	27	Gmc	F	yes	yes
AKAGERA			Savannah	Kabaya	ANP6	Wet	April	31	Gp	M	yes	yes
AKAGERA			Savannah	Kabaya	ANP6	Wet	April	62	Gp	F	yes	yes
AKAGERA			Savannah	Kabaya	ANP6	Wet	April	27	Gmc	M	yes	yes
AKAGERA			Savannah	Kabaya	ANP6	Wet	April	41	Gmc	F	yes	yes
AKAGERA			Savannah	Kabaya	ANP6	Wet	May	24	Gp	M	yes	yes
AKAGERA			Savannah	Kabaya	ANP6	Wet	May	33	Gp	F	yes	yes
AKAGERA			Savannah	Kabaya	ANP6	Wet	May	16	Gmc	M	yes	yes
AKAGERA			Savannah	Kabaya	ANP6	Wet	May	33	Gmc	F	yes	yes
AKAGERA			Mountain	Rwisirabo	ANP7	Dry	June	35	Gp	M	yes	yes	Tabanids	30.7167	-1.77312	Open woodland
AKAGERA			Mountain	Rwisirabo	ANP7	Dry	June	74	Gp	F	yes	yes
AKAGERA			Mountain	Rwisirabo	ANP7	Dry	June	26	Gmc	M	yes	yes
AKAGERA			Mountain	Rwisirabo	ANP7	Dry	June	31	Gmc	F	yes	yes
AKAGERA			Mountain	Rwisirabo	ANP7	Dry	July	56	Gp	M	yes	yes
AKAGERA			Mountain	Rwisirabo	ANP7	Dry	July	98	Gp	F	yes	yes
AKAGERA			Mountain	Rwisirabo	ANP7	Dry	July	27	Gmc	M	yes	yes
AKAGERA			Mountain	Rwisirabo	ANP7	Dry	July	42	Gmc	F	yes	yes
AKAGERA			Mountain	Rwisirabo	ANP7	Dry	August				no
AKAGERA			Mountain	Rwisirabo	ANP7	Dry	August				no
AKAGERA			Mountain	Rwisirabo	ANP7	Dry	August				no
AKAGERA			Mountain	Rwisirabo	ANP7	Dry	August				no
AKAGERA			Mountain	Rwisirabo	ANP7	Wet	March	39	Gp	M	yes	yes
AKAGERA			Mountain	Rwisirabo	ANP7	Wet	March	57	Gp	F	yes	yes
AKAGERA			Mountain	Rwisirabo	ANP7	Wet	March	8	Gmc	M	yes	yes
AKAGERA			Mountain	Rwisirabo	ANP7	Wet	March	16	Gmc	F	yes	yes
AKAGERA			Mountain	Rwisirabo	ANP7	Wet	April	127	Gp	M	yes	yes
AKAGERA			Mountain	Rwisirabo	ANP7	Wet	April	177	Gp	F	yes	yes
AKAGERA			Mountain	Rwisirabo	ANP7	Wet	April	78	Gmc	M	yes	yes
AKAGERA			Mountain	Rwisirabo	ANP7	Wet	April	105	Gmc	F	yes	yes
AKAGERA			Mountain	Rwisirabo	ANP7	Wet	May	74	Gp	M	yes	yes
AKAGERA			Mountain	Rwisirabo	ANP7	Wet	May	113	Gp	F	yes	yes
AKAGERA			Mountain	Rwisirabo	ANP7	Wet	May	26	Gmc	M	yes	yes
AKAGERA			Mountain	Rwisirabo	ANP7	Wet	May	43	Gmc	F	yes	yes
AKAGERA			Mountain	Kitabire	ANP8	Dry	June	35	Gp	M	yes	yes	Tabanids	30.6631	-1.65014	Open woodland
AKAGERA			Mountain	Kitabire	ANP8	Dry	June	53	Gp	F	yes	yes
AKAGERA			Mountain	Kitabire	ANP8	Dry	June	17	Gmc	M	yes	yes
AKAGERA			Mountain	Kitabire	ANP8	Dry	June	27	Gmc	F	yes	yes
AKAGERA			Mountain	Kitabire	ANP8	Dry	July	14	Gp	M	yes	yes
AKAGERA			Mountain	Kitabire	ANP8	Dry	July	22	Gp	F	yes	yes
AKAGERA			Mountain	Kitabire	ANP8	Dry	July	7	Gmc	M	yes	yes
AKAGERA			Mountain	Kitabire	ANP8	Dry	July	12	Gmc	F	yes	yes
AKAGERA			Mountain	Kitabire	ANP8	Dry	August				no
AKAGERA			Mountain	Kitabire	ANP8	Dry	August				no
AKAGERA			Mountain	Kitabire	ANP8	Dry	August				no
AKAGERA			Mountain	Kitabire	ANP8	Dry	August				no
AKAGERA			Mountain	Kitabire	ANP8	Wet	March	27	Gp	M	yes	yes
AKAGERA			Mountain	Kitabire	ANP8	Wet	March	55	Gp	F	yes	yes
AKAGERA			Mountain	Kitabire	ANP8	Wet	March	29	Gmc	M	yes	yes
AKAGERA			Mountain	Kitabire	ANP8	Wet	March	42	Gmc	F	yes	yes
AKAGERA			Mountain	Kitabire	ANP8	Wet	April	96	Gp	M	yes	yes
AKAGERA			Mountain	Kitabire	ANP8	Wet	April	193	Gp	F	yes	yes
AKAGERA			Mountain	Kitabire	ANP8	Wet	April	42	Gmc	M	yes	yes
AKAGERA			Mountain	Kitabire	ANP8	Wet	April	66	Gmc	F	yes	yes
AKAGERA			Mountain	Kitabire	ANP8	Wet	May	38	Gp	M	yes	yes
AKAGERA			Mountain	Kitabire	ANP8	Wet	May	75	Gp	F	yes	yes
AKAGERA			Mountain	Kitabire	ANP8	Wet	May	8	Gmc	M	yes	yes
AKAGERA			Mountain	Kitabire	ANP8	Wet	May	11	Gmc	F	yes	yes
AKAGERA			Mountain	Nyamatete	ANP9	Dry	June	96	Gp	M	yes	yes	Tabanids	30.6248	-1.5328	Open woodland
AKAGERA			Mountain	Nyamatete	ANP9	Dry	June	121	Gp	F	yes	yes
AKAGERA			Mountain	Nyamatete	ANP9	Dry	June	23	Gmc	M	yes	yes
AKAGERA			Mountain	Nyamatete	ANP9	Dry	June	29	Gmc	F	yes	yes
AKAGERA			Mountain	Nyamatete	ANP9	Dry	July	55	Gp	M	yes	yes
AKAGERA			Mountain	Nyamatete	ANP9	Dry	July	88	Gp	F	yes	yes
AKAGERA			Mountain	Nyamatete	ANP9	Dry	July	25	Gmc	M	yes	yes
AKAGERA			Mountain	Nyamatete	ANP9	Dry	July	39	Gmc	F	yes	yes
AKAGERA			Mountain	Nyamatete	ANP9	Dry	August	27	Gp	M	yes	yes
AKAGERA			Mountain	Nyamatete	ANP9	Dry	August	40	Gp	F	yes	yes
AKAGERA			Mountain	Nyamatete	ANP9	Dry	August	19	Gmc	M	yes	yes
AKAGERA			Mountain	Nyamatete	ANP9	Dry	August	29	Gmc	F	yes	yes
AKAGERA			Mountain	Nyamatete	ANP9	Wet	March	118	Gp	M	yes	yes
AKAGERA			Mountain	Nyamatete	ANP9	Wet	March	199	Gp	F	yes	yes
AKAGERA			Mountain	Nyamatete	ANP9	Wet	March	63	Gmc	M	yes	yes
AKAGERA			Mountain	Nyamatete	ANP9	Wet	March	96	Gmc	F	yes	yes
AKAGERA			Mountain	Nyamatete	ANP9	Wet	April	237	Gp	M	yes	yes
AKAGERA			Mountain	Nyamatete	ANP9	Wet	April	354	Gp	F	yes	yes
AKAGERA			Mountain	Nyamatete	ANP9	Wet	April	84	Gmc	M	yes	yes
AKAGERA			Mountain	Nyamatete	ANP9	Wet	April	147	Gmc	F	yes	yes
AKAGERA			Mountain	Nyamatete	ANP9	Wet	May	145	Gp	M	yes	yes
AKAGERA			Mountain	Nyamatete	ANP9	Wet	May	263	Gp	F	yes	yes
AKAGERA			Mountain	Nyamatete	ANP9	Wet	May	89	Gmc	M	yes	yes
AKAGERA			Mountain	Nyamatete	ANP9	Wet	May	122	Gmc	F	yes	yes
AKAGERA			Mountain	Reception	ANP10	Dry	June	75	Gp	M	yes	yes	Tabanids + Stomoxys	30.7034	-1.87925	woodland
AKAGERA			Mountain	Reception	ANP10	Dry	June	91	Gp	F	yes	yes
AKAGERA			Mountain	Reception	ANP10	Dry	June	16	Gmc	M	yes	yes
AKAGERA			Mountain	Reception	ANP10	Dry	June	21	Gmc	F	yes	yes
AKAGERA			Mountain	Reception	ANP10	Dry	July	34	Gp	M	yes	yes
AKAGERA			Mountain	Reception	ANP10	Dry	July	59	Gp	F	yes	yes
AKAGERA			Mountain	Reception	ANP10	Dry	July	18	Gmc	M	yes	yes
AKAGERA			Mountain	Reception	ANP10	Dry	July	30	Gmc	F	yes	yes
AKAGERA			Mountain	Reception	ANP10	Dry	August	27	Gp	M	yes	yes
AKAGERA			Mountain	Reception	ANP10	Dry	August	37	Gp	F	yes	yes
AKAGERA			Mountain	Reception	ANP10	Dry	August	13	Gmc	M	yes	yes
AKAGERA			Mountain	Reception	ANP10	Dry	August	19	Gmc	F	yes	yes
AKAGERA			Mountain	Reception	ANP10	Wet	March	89	Gp	M	yes	yes
AKAGERA			Mountain	Reception	ANP10	Wet	March	123	Gp	F	yes	yes
AKAGERA			Mountain	Reception	ANP10	Wet	March	38	Gmc	M	yes	yes
AKAGERA			Mountain	Reception	ANP10	Wet	March	51	Gmc	F	yes	yes
AKAGERA			Mountain	Reception	ANP10	Wet	April	314	Gp	M	yes	yes
AKAGERA			Mountain	Reception	ANP10	Wet	April	543	Gp	F	yes	yes
AKAGERA			Mountain	Reception	ANP10	Wet	April	125	Gmc	M	yes	yes
AKAGERA			Mountain	Reception	ANP10	Wet	April	222	Gmc	F	yes	yes
AKAGERA			Mountain	Reception	ANP10	Wet	May	213	Gp	M	yes	yes
AKAGERA			Mountain	Reception	ANP10	Wet	May	291	Gp	F	yes	yes
AKAGERA			Mountain	Reception	ANP10	Wet	May	97	Gmc	M	yes	yes
AKAGERA			Mountain	Reception	ANP10	Wet	May	129	Gmc	F	yes	yes
AKAGERA			Savannah	Rwimbogo	ANP11	Dry	June	6	Gp	M	yes	yes	Tabanids	30.6356	-1.45985	Woodland
AKAGERA			Savannah	Rwimbogo	ANP11	Dry	June	24	Gp	F	yes	yes
AKAGERA			Savannah	Rwimbogo	ANP11	Dry	June				no
AKAGERA			Savannah	Rwimbogo	ANP11	Dry	June	6	Gmc	F	yes	yes
AKAGERA			Savannah	Rwimbogo	ANP11	Dry	July	5	Gp	M	yes	no
AKAGERA			Savannah	Rwimbogo	ANP11	Dry	July	16	Gp	F	yes	no
AKAGERA			Savannah	Rwimbogo	ANP11	Dry	July				no
AKAGERA			Savannah	Rwimbogo	ANP11	Dry	July				no
AKAGERA			Savannah	Rwimbogo	ANP11	Dry	August				no
AKAGERA			Savannah	Rwimbogo	ANP11	Dry	August				no
AKAGERA			Savannah	Rwimbogo	ANP11	Dry	August				no
AKAGERA			Savannah	Rwimbogo	ANP11	Dry	August				no
AKAGERA			Savannah	Rwimbogo	ANP11	Wet	March	9	Gp	M	yes	yes
AKAGERA			Savannah	Rwimbogo	ANP11	Wet	March	14	Gp	F	yes	yes
AKAGERA			Savannah	Rwimbogo	ANP11	Wet	March				no
AKAGERA			Savannah	Rwimbogo	ANP11	Wet	March	6	Gmc	F	yes	yes
AKAGERA			Savannah	Rwimbogo	ANP11	Wet	April	13	Gp	M	yes	yes
AKAGERA			Savannah	Rwimbogo	ANP11	Wet	April	21	Gp	F	yes	yes
AKAGERA			Savannah	Rwimbogo	ANP11	Wet	April	5	Gmc	M	yes	yes
AKAGERA			Savannah	Rwimbogo	ANP11	Wet	April	9	Gmc	F	yes	yes
AKAGERA			Savannah	Rwimbogo	ANP11	Wet	May	5	Gp	M	yes	no
AKAGERA			Savannah	Rwimbogo	ANP11	Wet	May	9	Gp	F	yes	no
AKAGERA			Savannah	Rwimbogo	ANP11	Wet	May				no
AKAGERA			Savannah	Rwimbogo	ANP11	Wet	May				no
AKAGERA			Savannah	Nyungwe	ANP12	Dry	June	21	Gp	M	yes	yes	Tabanids+stomoxys	30.6025	-1.4117	woodland
AKAGERA			Savannah	Nyungwe	ANP12	Dry	June	39	Gp	F	yes	yes
AKAGERA			Savannah	Nyungwe	ANP12	Dry	June	12	Gmc	M	yes	yes
AKAGERA			Savannah	Nyungwe	ANP12	Dry	June	19	Gmc	F	yes	yes
AKAGERA			Savannah	Nyungwe	ANP12	Dry	July	17	Gp	M	yes	yes
AKAGERA			Savannah	Nyungwe	ANP12	Dry	July	19	Gp	F	yes	yes
AKAGERA			Savannah	Nyungwe	ANP12	Dry	July				no
AKAGERA			Savannah	Nyungwe	ANP12	Dry	July	13	Gmc	F	yes	yes
AKAGERA			Savannah	Nyungwe	ANP12	Dry	August				no	no
AKAGERA			Savannah	Nyungwe	ANP12	Dry	August	11	Gp	F	yes	no
AKAGERA			Savannah	Nyungwe	ANP12	Dry	August				no
AKAGERA			Savannah	Nyungwe	ANP12	Dry	August				no
AKAGERA			Savannah	Nyungwe	ANP12	Wet	March	22	Gp	M	yes	yes
AKAGERA			Savannah	Nyungwe	ANP12	Wet	March	37	Gp	F	yes	yes
AKAGERA			Savannah	Nyungwe	ANP12	Wet	March	2	Gmc	M	yes	yes
AKAGERA			Savannah	Nyungwe	ANP12	Wet	March	10	Gmc	F	yes	yes
AKAGERA			Savannah	Nyungwe	ANP12	Wet	April	26	Gp	M	yes	yes
AKAGERA			Savannah	Nyungwe	ANP12	Wet	April	48	Gp	F	yes	yes
AKAGERA			Savannah	Nyungwe	ANP12	Wet	April	12	Gmc	M	yes	yes
AKAGERA			Savannah	Nyungwe	ANP12	Wet	April	17	Gmc	F	yes	yes
AKAGERA			Savannah	Nyungwe	ANP12	Wet	May	18	Gp	M	yes	yes
AKAGERA			Savannah	Nyungwe	ANP12	Wet	May	26	Gp	F	yes	yes
AKAGERA			Savannah	Nyungwe	ANP12	Wet	May	6	Gmc	M	yes	yes
AKAGERA			Savannah	Nyungwe	ANP12	Wet	May	11	Gmc	F	yes	yes
INTERFACE	NYAGATARE	KARANGAZI		Akayange	N01	Dry	June	115	Gp	M	yes	yes	Stomoxys+ Tabanids	30.5483	-1.35007	Open grassland, Swampy
INTERFACE	NYAGATARE	KARANGAZI		Akayange	N01	Dry	June	174	Gp	F	yes	yes
INTERFACE	NYAGATARE	KARANGAZI		Akayange	N01	Dry	June	23	Gmc	M	yes	yes
INTERFACE	NYAGATARE	KARANGAZI		Akayange	N01	Dry	June	48	Gmc	F	yes	yes
INTERFACE	NYAGATARE	KARANGAZI		Akayange	N01	Dry	July	105	Gp	M	yes	yes
INTERFACE	NYAGATARE	KARANGAZI		Akayange	N01	Dry	July	137	Gp	F	yes	yes
INTERFACE	NYAGATARE	KARANGAZI		Akayange	N01	Dry	July	27	Gmc	M	yes	yes
INTERFACE	NYAGATARE	KARANGAZI		Akayange	N01	Dry	July	52	Gmc	F	yes	yes
INTERFACE	NYAGATARE	KARANGAZI		Akayange	N01	Dry	August	55	Gp	M	yes	yes
INTERFACE	NYAGATARE	KARANGAZI		Akayange	N01	Dry	August	118	Gp	F	yes	yes
INTERFACE	NYAGATARE	KARANGAZI		Akayange	N01	Dry	August	36	Gmc	M	yes	yes
INTERFACE	NYAGATARE	KARANGAZI		Akayange	N01	Dry	August	58	Gmc	F	yes	yes
INTERFACE	NYAGATARE	KARANGAZI		Akayange	N01	Wet	March	16	Gp	M	yes	yes
INTERFACE	NYAGATARE	KARANGAZI		Akayange	N01	Wet	March	21	Gp	F	yes	yes
INTERFACE	NYAGATARE	KARANGAZI		Akayange	N01	Wet	March	6	Gmc	M	yes	yes
INTERFACE	NYAGATARE	KARANGAZI		Akayange	N01	Wet	March	13	Gmc	F	yes	yes
INTERFACE	NYAGATARE	KARANGAZI		Akayange	N01	Wet	April	910	Gp	M	yes	yes
INTERFACE	NYAGATARE	KARANGAZI		Akayange	N01	Wet	April	1407	Gp	F	yes	yes
INTERFACE	NYAGATARE	KARANGAZI		Akayange	N01	Wet	April	212	Gmc	M	yes	yes
INTERFACE	NYAGATARE	KARANGAZI		Akayange	N01	Wet	April	266	Gmc	F	yes	yes
INTERFACE	NYAGATARE	KARANGAZI		Akayange	N01	Wet	May	105	Gp	M	yes	yes
INTERFACE	NYAGATARE	KARANGAZI		Akayange	N01	Wet	May	144	Gp	F	yes	yes
INTERFACE	NYAGATARE	KARANGAZI		Akayange	N01	Wet	May	38	Gmc	M	yes	yes
INTERFACE	NYAGATARE	KARANGAZI		Akayange	N01	Wet	May	51	Gmc	F	yes	yes
INTERFACE	NYAGATARE	KARANGAZI		Akayange	N02	Dry	June	22	Gp	M	yes	yes	Stomoxys	30.5497	-1.38838	woodland
INTERFACE	NYAGATARE	KARANGAZI		Akayange	N02	Dry	June	39	Gp	F	yes	yes
INTERFACE	NYAGATARE	KARANGAZI		Akayange	N02	Dry	June	7	Gmc	M	yes	yes
INTERFACE	NYAGATARE	KARANGAZI		Akayange	N02	Dry	June	20	Gmc	F	yes	yes
INTERFACE	NYAGATARE	KARANGAZI		Akayange	N02	Dry	July	15	Gp	M	yes	yes
INTERFACE	NYAGATARE	KARANGAZI		Akayange	N02	Dry	July	20	Gp	F	yes	yes
INTERFACE	NYAGATARE	KARANGAZI		Akayange	N02	Dry	July	4	Gmc	M	yes	yes
INTERFACE	NYAGATARE	KARANGAZI		Akayange	N02	Dry	July	11	Gmc	F	yes	yes
INTERFACE	NYAGATARE	KARANGAZI		Akayange	N02	Dry	August	13	Gp	M	yes	yes
INTERFACE	NYAGATARE	KARANGAZI		Akayange	N02	Dry	August	19	Gp	F	yes	yes
INTERFACE	NYAGATARE	KARANGAZI		Akayange	N02	Dry	August				no
INTERFACE	NYAGATARE	KARANGAZI		Akayange	N02	Dry	August	13	Gmc	F	yes	yes
INTERFACE	NYAGATARE	KARANGAZI		Akayange	N02	Wet	March	14	Gp	M	yes	yes
INTERFACE	NYAGATARE	KARANGAZI		Akayange	N02	Wet	March	37	Gp	F	yes	yes
INTERFACE	NYAGATARE	KARANGAZI		Akayange	N02	Wet	March				no
INTERFACE	NYAGATARE	KARANGAZI		Akayange	N02	Wet	March	8	Gmc	F	yes	yes
INTERFACE	NYAGATARE	KARANGAZI		Akayange	N02	Wet	April	812	Gp	M	yes	yes
INTERFACE	NYAGATARE	KARANGAZI		Akayange	N02	Wet	April	1226	Gp	F	yes	yes
INTERFACE	NYAGATARE	KARANGAZI		Akayange	N02	Wet	April	227	Gmc	M	yes	yes
INTERFACE	NYAGATARE	KARANGAZI		Akayange	N02	Wet	April	389	Gmc	F	yes	yes
INTERFACE	NYAGATARE	KARANGAZI		Akayange	N02	Wet	May	111	Gp	M	yes	yes
INTERFACE	NYAGATARE	KARANGAZI		Akayange	N02	Wet	May	207	Gp	F	yes	yes
INTERFACE	NYAGATARE	KARANGAZI		Akayange	N02	Wet	May	29	Gmc	M	yes	yes
INTERFACE	NYAGATARE	KARANGAZI		Akayange	N02	Wet	May	53	Gmc	F	yes	yes
INTERFACE	NYAGATARE	KARANGAZI		Nyamirama	N03	Dry	June	19	Gp	M	yes	yes	Stomoxys, Tabanids, Keds	30.5356	-1.45356	woodland
INTERFACE	NYAGATARE	KARANGAZI		Nyamirama	N03	Dry	June	28	Gp	F	yes	yes
INTERFACE	NYAGATARE	KARANGAZI		Nyamirama	N03	Dry	June	7	Gmc	M	yes	yes
INTERFACE	NYAGATARE	KARANGAZI		Nyamirama	N03	Dry	June	9	Gmc	F	yes	yes
INTERFACE	NYAGATARE	KARANGAZI		Nyamirama	N03	Dry	July	11	Gp	M	yes	yes
INTERFACE	NYAGATARE	KARANGAZI		Nyamirama	N03	Dry	July	19	Gp	F	yes	yes
INTERFACE	NYAGATARE	KARANGAZI		Nyamirama	N03	Dry	July	2	Gmc	M	yes	yes
INTERFACE	NYAGATARE	KARANGAZI		Nyamirama	N03	Dry	July	7	Gmc	F	yes	yes
INTERFACE	NYAGATARE	KARANGAZI		Nyamirama	N03	Dry	August	4	Gp	M	yes	no
INTERFACE	NYAGATARE	KARANGAZI		Nyamirama	N03	Dry	August	12	Gp	F	yes	no
INTERFACE	NYAGATARE	KARANGAZI		Nyamirama	N03	Dry	August				no
INTERFACE	NYAGATARE	KARANGAZI		Nyamirama	N03	Dry	August				no
INTERFACE	NYAGATARE	KARANGAZI		Nyamirama	N03	Wet	March	3	Gp	M	yes	no
INTERFACE	NYAGATARE	KARANGAZI		Nyamirama	N03	Wet	March	9	Gp	F	yes	no
INTERFACE	NYAGATARE	KARANGAZI		Nyamirama	N03	Wet	March				no
INTERFACE	NYAGATARE	KARANGAZI		Nyamirama	N03	Wet	March				no
INTERFACE	NYAGATARE	KARANGAZI		Nyamirama	N03	Wet	April	92	Gp	M	yes	yes
INTERFACE	NYAGATARE	KARANGAZI		Nyamirama	N03	Wet	April	157	Gp	F	yes	yes
INTERFACE	NYAGATARE	KARANGAZI		Nyamirama	N03	Wet	April	25	Gmc	M	yes	yes
INTERFACE	NYAGATARE	KARANGAZI		Nyamirama	N03	Wet	April	62	Gmc	F	yes	yes
INTERFACE	NYAGATARE	KARANGAZI		Nyamirama	N03	Wet	May	33	Gp	M	yes	yes
INTERFACE	NYAGATARE	KARANGAZI		Nyamirama	N03	Wet	May	45	Gp	F	yes	yes
INTERFACE	NYAGATARE	KARANGAZI		Nyamirama	N03	Wet	May	22	Gmc	M	yes	yes
INTERFACE	NYAGATARE	KARANGAZI		Nyamirama	N03	Wet	May	31	Gmc	F	yes	yes
INTERFACE	NYAGATARE	KARANGAZI		Akayange	N04	Dry	June				no		Stomoxys	30.5087	-1.34522	Open grassland
INTERFACE	NYAGATARE	KARANGAZI		Akayange	N04	Dry	June				no
INTERFACE	NYAGATARE	KARANGAZI		Akayange	N04	Dry	June				no
INTERFACE	NYAGATARE	KARANGAZI		Akayange	N04	Dry	June				no
INTERFACE	NYAGATARE	KARANGAZI		Akayange	N04	Dry	July				no
INTERFACE	NYAGATARE	KARANGAZI		Akayange	N04	Dry	July				no
INTERFACE	NYAGATARE	KARANGAZI		Akayange	N04	Dry	July				no
INTERFACE	NYAGATARE	KARANGAZI		Akayange	N04	Dry	July				no
INTERFACE	NYAGATARE	KARANGAZI		Akayange	N04	Dry	August				no
INTERFACE	NYAGATARE	KARANGAZI		Akayange	N04	Dry	August				no
INTERFACE	NYAGATARE	KARANGAZI		Akayange	N04	Dry	August				no
INTERFACE	NYAGATARE	KARANGAZI		Akayange	N04	Dry	August				no
INTERFACE	NYAGATARE	KARANGAZI		Akayange	N04	Wet	March				no
INTERFACE	NYAGATARE	KARANGAZI		Akayange	N04	Wet	March				no
INTERFACE	NYAGATARE	KARANGAZI		Akayange	N04	Wet	March				no
INTERFACE	NYAGATARE	KARANGAZI		Akayange	N04	Wet	March				no
INTERFACE	NYAGATARE	KARANGAZI		Akayange	N04	Wet	April				no
INTERFACE	NYAGATARE	KARANGAZI		Akayange	N04	Wet	April				no
INTERFACE	NYAGATARE	KARANGAZI		Akayange	N04	Wet	April				no
INTERFACE	NYAGATARE	KARANGAZI		Akayange	N04	Wet	April				no
INTERFACE	NYAGATARE	KARANGAZI		Akayange	N04	Wet	May				no
INTERFACE	NYAGATARE	KARANGAZI		Akayange	N04	Wet	May				no
INTERFACE	NYAGATARE	KARANGAZI		Akayange	N04	Wet	May				no
INTERFACE	NYAGATARE	KARANGAZI		Akayange	N04	Wet	May				no
INTERFACE	NYAGATARE	KARANGAZI		Akayange	N05	Dry	June				no		Stomoxys	30.5008	-1.39895	Open grassland
INTERFACE	NYAGATARE	KARANGAZI		Akayange	N05	Dry	June				no
INTERFACE	NYAGATARE	KARANGAZI		Akayange	N05	Dry	June				no
INTERFACE	NYAGATARE	KARANGAZI		Akayange	N05	Dry	june				no
INTERFACE	NYAGATARE	KARANGAZI		Akayange	N05	Dry	July				no
INTERFACE	NYAGATARE	KARANGAZI		Akayange	N05	Dry	July				no
INTERFACE	NYAGATARE	KARANGAZI		Akayange	N05	Dry	July				no
INTERFACE	NYAGATARE	KARANGAZI		Akayange	N05	Dry	July				no
INTERFACE	NYAGATARE	KARANGAZI		Akayange	N05	Dry	August				no
INTERFACE	NYAGATARE	KARANGAZI		Akayange	N05	Dry	August				no
INTERFACE	NYAGATARE	KARANGAZI		Akayange	N05	Dry	August				no
INTERFACE	NYAGATARE	KARANGAZI		Akayange	N05	Dry	August				no
INTERFACE	NYAGATARE	KARANGAZI		Akayange	N05	Wet	March				no
INTERFACE	NYAGATARE	KARANGAZI		Akayange	N05	Wet	March				no
INTERFACE	NYAGATARE	KARANGAZI		Akayange	N05	Wet	March				no
INTERFACE	NYAGATARE	KARANGAZI		Akayange	N05	Wet	March				no
INTERFACE	NYAGATARE	KARANGAZI		Akayange	N05	Wet	April				no
INTERFACE	NYAGATARE	KARANGAZI		Akayange	N05	Wet	April				no
INTERFACE	NYAGATARE	KARANGAZI		Akayange	N05	Wet	April				no
INTERFACE	NYAGATARE	KARANGAZI		Akayange	N05	Wet	April				no
INTERFACE	NYAGATARE	KARANGAZI		Akayange	N05	Wet	May				no
INTERFACE	NYAGATARE	KARANGAZI		Akayange	N05	Wet	May				no
INTERFACE	NYAGATARE	KARANGAZI		Akayange	N05	Wet	May				no
INTERFACE	NYAGATARE	KARANGAZI		Akayange	N05	Wet	May				no
INTERFACE	NYAGATARE	KARANGAZI		Nyamirama	N06	Dry	June				no		Stomoxys	30.4867	-1.47073	Open woodland
INTERFACE	NYAGATARE	KARANGAZI		Nyamirama	N06	Dry	June				no
INTERFACE	NYAGATARE	KARANGAZI		Nyamirama	N06	Dry	June				no
INTERFACE	NYAGATARE	KARANGAZI		Nyamirama	N06	Dry	june				no
INTERFACE	NYAGATARE	KARANGAZI		Nyamirama	N06	Dry	July				no
INTERFACE	NYAGATARE	KARANGAZI		Nyamirama	N06	Dry	July				no
INTERFACE	NYAGATARE	KARANGAZI		Nyamirama	N06	Dry	July				no
INTERFACE	NYAGATARE	KARANGAZI		Nyamirama	N06	Dry	July				no
INTERFACE	NYAGATARE	KARANGAZI		Nyamirama	N06	Dry	August				no
INTERFACE	NYAGATARE	KARANGAZI		Nyamirama	N06	Dry	August				no
INTERFACE	NYAGATARE	KARANGAZI		Nyamirama	N06	Dry	August				no
INTERFACE	NYAGATARE	KARANGAZI		Nyamirama	N06	Dry	August				no
INTERFACE	NYAGATARE	KARANGAZI		Nyamirama	N06	Wet	March				no
INTERFACE	NYAGATARE	KARANGAZI		Nyamirama	N06	Wet	March				no
INTERFACE	NYAGATARE	KARANGAZI		Nyamirama	N06	Wet	March				no
INTERFACE	NYAGATARE	KARANGAZI		Nyamirama	N06	Wet	March				no
INTERFACE	NYAGATARE	KARANGAZI		Nyamirama	N06	Wet	April				no
INTERFACE	NYAGATARE	KARANGAZI		Nyamirama	N06	Wet	April	12	Gp	F	yes	yes
INTERFACE	NYAGATARE	KARANGAZI		Nyamirama	N06	Wet	April				no
INTERFACE	NYAGATARE	KARANGAZI		Nyamirama	N06	Wet	April	1	Gmc	F	yes	yes
INTERFACE	NYAGATARE	KARANGAZI		Nyamirama	N06	Wet	May	1	Gp	M	yes	no
INTERFACE	NYAGATARE	KARANGAZI		Nyamirama	N06	Wet	May				no
INTERFACE	NYAGATARE	KARANGAZI		Nyamirama	N06	Wet	May				no
INTERFACE	NYAGATARE	KARANGAZI		Nyamirama	N06	Wet	May				no
INTERFACE	NYAGATARE	RWIMIYAGA		Karushuga	N07	Dry	June				no		Stomoxys	30.5401	-1.29857	Swampy, Riverine
INTERFACE	NYAGATARE	RWIMIYAGA		Karushuga	N07	Dry	June				no
INTERFACE	NYAGATARE	RWIMIYAGA		Karushuga	N07	Dry	June				no
INTERFACE	NYAGATARE	RWIMIYAGA		Karushuga	N07	Dry	june				no
INTERFACE	NYAGATARE	RWIMIYAGA		Karushuga	N07	Dry	July				no
INTERFACE	NYAGATARE	RWIMIYAGA		Karushuga	N07	Dry	July				no
INTERFACE	NYAGATARE	RWIMIYAGA		Karushuga	N07	Dry	July				no
INTERFACE	NYAGATARE	RWIMIYAGA		Karushuga	N07	Dry	July				no
INTERFACE	NYAGATARE	RWIMIYAGA		Karushuga	N07	Dry	August				no
INTERFACE	NYAGATARE	RWIMIYAGA		Karushuga	N07	Dry	August				no
INTERFACE	NYAGATARE	RWIMIYAGA		Karushuga	N07	Dry	August				no
INTERFACE	NYAGATARE	RWIMIYAGA		Karushuga	N07	Dry	August				no
INTERFACE	NYAGATARE	RWIMIYAGA		Karushuga	N07	Wet	March				no
INTERFACE	NYAGATARE	RWIMIYAGA		Karushuga	N07	Wet	March				no
INTERFACE	NYAGATARE	RWIMIYAGA		Karushuga	N07	Wet	March				no
INTERFACE	NYAGATARE	RWIMIYAGA		Karushuga	N07	Wet	March				no
INTERFACE	NYAGATARE	RWIMIYAGA		Karushuga	N07	Wet	April				no
INTERFACE	NYAGATARE	RWIMIYAGA		Karushuga	N07	Wet	April				no
INTERFACE	NYAGATARE	RWIMIYAGA		Karushuga	N07	Wet	April				no
INTERFACE	NYAGATARE	RWIMIYAGA		Karushuga	N07	Wet	April				no
INTERFACE	NYAGATARE	RWIMIYAGA		Karushuga	N07	Wet	May				no
INTERFACE	NYAGATARE	RWIMIYAGA		Karushuga	N07	Wet	May				no
INTERFACE	NYAGATARE	RWIMIYAGA		Karushuga	N07	Wet	May				no
INTERFACE	NYAGATARE	RWIMIYAGA		Karushuga	N07	Wet	May				no
INTERFACE	NYAGATARE	RWIMIYAGA		Karushuga	N08	Dry	June				no		Stomoxys	30.5338	-1.25397	Swampy, Riverine
INTERFACE	NYAGATARE	RWIMIYAGA		Karushuga	N08	Dry	June				no
INTERFACE	NYAGATARE	RWIMIYAGA		Karushuga	N08	Dry	June				no
INTERFACE	NYAGATARE	RWIMIYAGA		Karushuga	N08	Dry	june				no
INTERFACE	NYAGATARE	RWIMIYAGA		Karushuga	N08	Dry	July				no
INTERFACE	NYAGATARE	RWIMIYAGA		Karushuga	N08	Dry	July				no
INTERFACE	NYAGATARE	RWIMIYAGA		Karushuga	N08	Dry	July				no
INTERFACE	NYAGATARE	RWIMIYAGA		Karushuga	N08	Dry	July				no
INTERFACE	NYAGATARE	RWIMIYAGA		Karushuga	N08	Dry	August				no
INTERFACE	NYAGATARE	RWIMIYAGA		Karushuga	N08	Dry	August				no
INTERFACE	NYAGATARE	RWIMIYAGA		Karushuga	N08	Dry	August				no
INTERFACE	NYAGATARE	RWIMIYAGA		Karushuga	N08	Dry	August				no
INTERFACE	NYAGATARE	RWIMIYAGA		Karushuga	N08	Wet	March				no
INTERFACE	NYAGATARE	RWIMIYAGA		Karushuga	N08	Wet	March				no
INTERFACE	NYAGATARE	RWIMIYAGA		Karushuga	N08	Wet	March				no
INTERFACE	NYAGATARE	RWIMIYAGA		Karushuga	N08	Wet	March				no
INTERFACE	NYAGATARE	RWIMIYAGA		Karushuga	N08	Wet	April				no
INTERFACE	NYAGATARE	RWIMIYAGA		Karushuga	N08	Wet	April	7	Gp	F	yes	no
INTERFACE	NYAGATARE	RWIMIYAGA		Karushuga	N08	Wet	April				no
INTERFACE	NYAGATARE	RWIMIYAGA		Karushuga	N08	Wet	April				no
INTERFACE	NYAGATARE	RWIMIYAGA		Karushuga	N08	Wet	May	1	Gp	M	yes	no
INTERFACE	NYAGATARE	RWIMIYAGA		Karushuga	N08	Wet	May	1	Gp	F	yes	no
INTERFACE	NYAGATARE	RWIMIYAGA		Karushuga	N08	Wet	May				no
INTERFACE	NYAGATARE	RWIMIYAGA		Karushuga	N08	Wet	May				no
INTERFACE	NYAGATARE	RWIMIYAGA		Cyamunyana	N09	Dry	June				no		Stomoxys	30.4999	-1.20952	Open grassland
INTERFACE	NYAGATARE	RWIMIYAGA		Cyamunyana	N09	Dry	June				no
INTERFACE	NYAGATARE	RWIMIYAGA		Cyamunyana	N09	Dry	June				no
INTERFACE	NYAGATARE	RWIMIYAGA		Cyamunyana	N09	Dry	june				no
INTERFACE	NYAGATARE	RWIMIYAGA		Cyamunyana	N09	Dry	July				no
INTERFACE	NYAGATARE	RWIMIYAGA		Cyamunyana	N09	Dry	July				no
INTERFACE	NYAGATARE	RWIMIYAGA		Cyamunyana	N09	Dry	July				no
INTERFACE	NYAGATARE	RWIMIYAGA		Cyamunyana	N09	Dry	July				no
INTERFACE	NYAGATARE	RWIMIYAGA		Cyamunyana	N09	Dry	August				no
INTERFACE	NYAGATARE	RWIMIYAGA		Cyamunyana	N09	Dry	August				no
INTERFACE	NYAGATARE	RWIMIYAGA		Cyamunyana	N09	Dry	August				no
INTERFACE	NYAGATARE	RWIMIYAGA		Cyamunyana	N09	Dry	August				no
INTERFACE	NYAGATARE	RWIMIYAGA		Cyamunyana	N09	Wet	March				no
INTERFACE	NYAGATARE	RWIMIYAGA		Cyamunyana	N09	Wet	March				no
INTERFACE	NYAGATARE	RWIMIYAGA		Cyamunyana	N09	Wet	March				no
INTERFACE	NYAGATARE	RWIMIYAGA		Cyamunyana	N09	Wet	March				no
INTERFACE	NYAGATARE	RWIMIYAGA		Cyamunyana	N09	Wet	April				no
INTERFACE	NYAGATARE	RWIMIYAGA		Cyamunyana	N09	Wet	April				no
INTERFACE	NYAGATARE	RWIMIYAGA		Cyamunyana	N09	Wet	April				no
INTERFACE	NYAGATARE	RWIMIYAGA		Cyamunyana	N09	Wet	April				no
INTERFACE	NYAGATARE	RWIMIYAGA		Cyamunyana	N09	Wet	May				no
INTERFACE	NYAGATARE	RWIMIYAGA		Cyamunyana	N09	Wet	May				no
INTERFACE	NYAGATARE	RWIMIYAGA		Cyamunyana	N09	Wet	May				no
INTERFACE	NYAGATARE	RWIMIYAGA		Cyamunyana	N09	Wet	May				no
INTERFACE	NYAGATARE	MATIMBA		Bwera	N10	Dry	June				no		Stomoxys	30.4663	-1.15971	Grassland, Riverine
INTERFACE	NYAGATARE	MATIMBA		Bwera	N10	Dry	June				no
INTERFACE	NYAGATARE	MATIMBA		Bwera	N10	Dry	June				no
INTERFACE	NYAGATARE	MATIMBA		Bwera	N10	Dry	june				no
INTERFACE	NYAGATARE	MATIMBA		Bwera	N10	Dry	July				no
INTERFACE	NYAGATARE	MATIMBA		Bwera	N10	Dry	July				no
INTERFACE	NYAGATARE	MATIMBA		Bwera	N10	Dry	July				no
INTERFACE	NYAGATARE	MATIMBA		Bwera	N10	Dry	July				no
INTERFACE	NYAGATARE	MATIMBA		Bwera	N10	Dry	August				no
INTERFACE	NYAGATARE	MATIMBA		Bwera	N10	Dry	August				no
INTERFACE	NYAGATARE	MATIMBA		Bwera	N10	Dry	August				no
INTERFACE	NYAGATARE	MATIMBA		Bwera	N10	Dry	August				no
INTERFACE	NYAGATARE	MATIMBA		Bwera	N10	Wet	March				no
INTERFACE	NYAGATARE	MATIMBA		Bwera	N10	Wet	March				no
INTERFACE	NYAGATARE	MATIMBA		Bwera	N10	Wet	March				no
INTERFACE	NYAGATARE	MATIMBA		Bwera	N10	Wet	March				no
INTERFACE	NYAGATARE	MATIMBA		Bwera	N10	Wet	April				no
INTERFACE	NYAGATARE	MATIMBA		Bwera	N10	Wet	April				no
INTERFACE	NYAGATARE	MATIMBA		Bwera	N10	Wet	April				no
INTERFACE	NYAGATARE	MATIMBA		Bwera	N10	Wet	April				no
INTERFACE	NYAGATARE	MATIMBA		Bwera	N10	Wet	May				no
INTERFACE	NYAGATARE	MATIMBA		Bwera	N10	Wet	May				no
INTERFACE	NYAGATARE	MATIMBA		Bwera	N10	Wet	May				no
INTERFACE	NYAGATARE	MATIMBA		Bwera	N10	Wet	May				no
INTERFACE	GATSIBO	RWIMBOGO		Gikobwa	G01	Dry	June				no		Stomoxys	30.5651	-1.49495	Woodland
INTERFACE	GATSIBO	RWIMBOGO		Gikobwa	G01	Dry	June				no
INTERFACE	GATSIBO	RWIMBOGO		Gikobwa	G01	Dry	June				no
INTERFACE	GATSIBO	RWIMBOGO		Gikobwa	G01	Dry	june				no
INTERFACE	GATSIBO	RWIMBOGO		Gikobwa	G01	Dry	July				no
INTERFACE	GATSIBO	RWIMBOGO		Gikobwa	G01	Dry	July				no
INTERFACE	GATSIBO	RWIMBOGO		Gikobwa	G01	Dry	July				no
INTERFACE	GATSIBO	RWIMBOGO		Gikobwa	G01	Dry	July				no
INTERFACE	GATSIBO	RWIMBOGO		Gikobwa	G01	Dry	August				no
INTERFACE	GATSIBO	RWIMBOGO		Gikobwa	G01	Dry	August				no
INTERFACE	GATSIBO	RWIMBOGO		Gikobwa	G01	Dry	August				no
INTERFACE	GATSIBO	RWIMBOGO		Gikobwa	G01	Dry	August				no
INTERFACE	GATSIBO	RWIMBOGO		Gikobwa	G01	Wet	March	5	Gp	M	yes	no
INTERFACE	GATSIBO	RWIMBOGO		Gikobwa	G01	Wet	March	14	Gp	F	yes	no
INTERFACE	GATSIBO	RWIMBOGO		Gikobwa	G01	Wet	March				no
INTERFACE	GATSIBO	RWIMBOGO		Gikobwa	G01	Wet	March				no
INTERFACE	GATSIBO	RWIMBOGO		Gikobwa	G01	Wet	April	10	Gp	M	yes	yes
INTERFACE	GATSIBO	RWIMBOGO		Gikobwa	G01	Wet	April	19	Gp	F	yes	yes
INTERFACE	GATSIBO	RWIMBOGO		Gikobwa	G01	Wet	April				no
INTERFACE	GATSIBO	RWIMBOGO		Gikobwa	G01	Wet	April	2	Gmc	F	yes	yes
INTERFACE	GATSIBO	RWIMBOGO		Gikobwa	G01	Wet	May	3	Gp	M	yes	no
INTERFACE	GATSIBO	RWIMBOGO		Gikobwa	G01	Wet	May	17	Gp	F	yes	no
INTERFACE	GATSIBO	RWIMBOGO		Gikobwa	G01	Wet	May				no
INTERFACE	GATSIBO	RWIMBOGO		Gikobwa	G01	Wet	May				no
INTERFACE	GATSIBO	RWIMBOGO		Gikobwa	G02	Dry	June				no		Stomoxys	30.5942	-1.5504	Woodland
INTERFACE	GATSIBO	RWIMBOGO		Gikobwa	G02	Dry	June				no
INTERFACE	GATSIBO	RWIMBOGO		Gikobwa	G02	Dry	June				no
INTERFACE	GATSIBO	RWIMBOGO		Gikobwa	G02	Dry	june				no
INTERFACE	GATSIBO	RWIMBOGO		Gikobwa	G02	Dry	July				no
INTERFACE	GATSIBO	RWIMBOGO		Gikobwa	G02	Dry	July				no
INTERFACE	GATSIBO	RWIMBOGO		Gikobwa	G02	Dry	July				no
INTERFACE	GATSIBO	RWIMBOGO		Gikobwa	G02	Dry	July				no
INTERFACE	GATSIBO	RWIMBOGO		Gikobwa	G02	Dry	August				no
INTERFACE	GATSIBO	RWIMBOGO		Gikobwa	G02	Dry	August				no
INTERFACE	GATSIBO	RWIMBOGO		Gikobwa	G02	Dry	August				no
INTERFACE	GATSIBO	RWIMBOGO		Gikobwa	G02	Dry	August				no
INTERFACE	GATSIBO	RWIMBOGO		Gikobwa	G02	Wet	March	1	Gp	M	yes	no
INTERFACE	GATSIBO	RWIMBOGO		Gikobwa	G02	Wet	March				no
INTERFACE	GATSIBO	RWIMBOGO		Gikobwa	G02	Wet	March				no
INTERFACE	GATSIBO	RWIMBOGO		Gikobwa	G02	Wet	March				no
INTERFACE	GATSIBO	RWIMBOGO		Gikobwa	G02	Wet	April	2	Gp	M	yes	yes
INTERFACE	GATSIBO	RWIMBOGO		Gikobwa	G02	Wet	April	6	Gp	F	yes	yes
INTERFACE	GATSIBO	RWIMBOGO		Gikobwa	G02	Wet	April	2	Gmc	M	yes	yes
INTERFACE	GATSIBO	RWIMBOGO		Gikobwa	G02	Wet	April				no
INTERFACE	GATSIBO	RWIMBOGO		Gikobwa	G02	Wet	May	4	Gp	F	yes	no
INTERFACE	GATSIBO	RWIMBOGO		Gikobwa	G02	Wet	May				no
INTERFACE	GATSIBO	RWIMBOGO		Gikobwa	G02	Wet	May				no
INTERFACE	GATSIBO	RWIMBOGO		Gikobwa	G02	Wet	May				no
INTERFACE	GATSIBO	RWIMBOGO		Mucucu I	G03	Dry	June				no		Stomoxys, Tabanids	30.6161	-1.59015	Woodland
INTERFACE	GATSIBO	RWIMBOGO		Mucucu I	G03	Dry	June				no
INTERFACE	GATSIBO	RWIMBOGO		Mucucu I	G03	Dry	June				no
INTERFACE	GATSIBO	RWIMBOGO		Mucucu I	G03	Dry	june				no
INTERFACE	GATSIBO	RWIMBOGO		Mucucu I	G03	Dry	July				no
INTERFACE	GATSIBO	RWIMBOGO		Mucucu I	G03	Dry	July				no
INTERFACE	GATSIBO	RWIMBOGO		Mucucu I	G03	Dry	July				no
INTERFACE	GATSIBO	RWIMBOGO		Mucucu I	G03	Dry	July				no
INTERFACE	GATSIBO	RWIMBOGO		Mucucu I	G03	Dry	August				no
INTERFACE	GATSIBO	RWIMBOGO		Mucucu I	G03	Dry	August	7	Gp	F	yes	no
INTERFACE	GATSIBO	RWIMBOGO		Mucucu I	G03	Dry	August				no
INTERFACE	GATSIBO	RWIMBOGO		Mucucu I	G03	Dry	August				no
INTERFACE	GATSIBO	RWIMBOGO		Mucucu I	G03	Wet	March	4	Gp	M	yes	yes
INTERFACE	GATSIBO	RWIMBOGO		Mucucu I	G03	Wet	March	9	Gp	F	yes	yes
INTERFACE	GATSIBO	RWIMBOGO		Mucucu I	G03	Wet	March				no
INTERFACE	GATSIBO	RWIMBOGO		Mucucu I	G03	Wet	March	4	Gmc	F	yes	yes
INTERFACE	GATSIBO	RWIMBOGO		Mucucu I	G03	Wet	April	6	Gp	M	yes	yes
INTERFACE	GATSIBO	RWIMBOGO		Mucucu I	G03	Wet	April	19	Gp	F	yes	yes
INTERFACE	GATSIBO	RWIMBOGO		Mucucu I	G03	Wet	April	1	Gmc	M	yes	yes
INTERFACE	GATSIBO	RWIMBOGO		Mucucu I	G03	Wet	April	4	Gmc	F	yes	yes
INTERFACE	GATSIBO	RWIMBOGO		Mucucu I	G03	Wet	May	7	Gp	M	yes	yes
INTERFACE	GATSIBO	RWIMBOGO		Mucucu I	G03	Wet	May	15	Gp	F	yes	yes
INTERFACE	GATSIBO	RWIMBOGO		Mucucu I	G03	Wet	May	2	Gmc	M	yes	yes
INTERFACE	GATSIBO	RWIMBOGO		Mucucu I	G03	Wet	May	4	Gmc	F	yes	yes
INTERFACE	GATSIBO	RWIMBOGO		Gikobwa	G04	Dry	June				no		Stomoxys	30.5546	-1.53268	Woodland
INTERFACE	GATSIBO	RWIMBOGO		Gikobwa	G04	Dry	June				no
INTERFACE	GATSIBO	RWIMBOGO		Gikobwa	G04	Dry	June				no
INTERFACE	GATSIBO	RWIMBOGO		Gikobwa	G04	Dry	june				no
INTERFACE	GATSIBO	RWIMBOGO		Gikobwa	G04	Dry	July	1	Gp	M	yes	no
INTERFACE	GATSIBO	RWIMBOGO		Gikobwa	G04	Dry	July	1	Gp	F	yes	no
INTERFACE	GATSIBO	RWIMBOGO		Gikobwa	G04	Dry	July				no
INTERFACE	GATSIBO	RWIMBOGO		Gikobwa	G04	Dry	July				no
INTERFACE	GATSIBO	RWIMBOGO		Gikobwa	G04	Dry	August				no
INTERFACE	GATSIBO	RWIMBOGO		Gikobwa	G04	Dry	August				no
INTERFACE	GATSIBO	RWIMBOGO		Gikobwa	G04	Dry	August				no
INTERFACE	GATSIBO	RWIMBOGO		Gikobwa	G04	Dry	August				no
INTERFACE	GATSIBO	RWIMBOGO		Gikobwa	G04	Wet	March				no
INTERFACE	GATSIBO	RWIMBOGO		Gikobwa	G04	Wet	March				no
INTERFACE	GATSIBO	RWIMBOGO		Gikobwa	G04	Wet	March				no
INTERFACE	GATSIBO	RWIMBOGO		Gikobwa	G04	Wet	March				no
INTERFACE	GATSIBO	RWIMBOGO		Gikobwa	G04	Wet	April	3	Gp	M	yes	no
INTERFACE	GATSIBO	RWIMBOGO		Gikobwa	G04	Wet	April	6	Gp	F	yes	no
INTERFACE	GATSIBO	RWIMBOGO		Gikobwa	G04	Wet	April				no
INTERFACE	GATSIBO	RWIMBOGO		Gikobwa	G04	Wet	April				no
INTERFACE	GATSIBO	RWIMBOGO		Gikobwa	G04	Wet	May				no
INTERFACE	GATSIBO	RWIMBOGO		Gikobwa	G04	Wet	May				no
INTERFACE	GATSIBO	RWIMBOGO		Gikobwa	G04	Wet	May				no
INTERFACE	GATSIBO	RWIMBOGO		Gikobwa	G04	Wet	May				no
INTERFACE	GATSIBO	RWIMBOGO		Gikobwa	G05	Dry	June				no		Stomoxys	30.565	-1.58968	Woodland
INTERFACE	GATSIBO	RWIMBOGO		Gikobwa	G05	Dry	June				no
INTERFACE	GATSIBO	RWIMBOGO		Gikobwa	G05	Dry	June				no
INTERFACE	GATSIBO	RWIMBOGO		Gikobwa	G05	Dry	june				no
INTERFACE	GATSIBO	RWIMBOGO		Gikobwa	G05	Dry	July				no
INTERFACE	GATSIBO	RWIMBOGO		Gikobwa	G05	Dry	July				no
INTERFACE	GATSIBO	RWIMBOGO		Gikobwa	G05	Dry	July				no
INTERFACE	GATSIBO	RWIMBOGO		Gikobwa	G05	Dry	July				no
INTERFACE	GATSIBO	RWIMBOGO		Gikobwa	G05	Dry	August				no
INTERFACE	GATSIBO	RWIMBOGO		Gikobwa	G05	Dry	August				no
INTERFACE	GATSIBO	RWIMBOGO		Gikobwa	G05	Dry	August				no
INTERFACE	GATSIBO	RWIMBOGO		Gikobwa	G05	Dry	August				no
INTERFACE	GATSIBO	RWIMBOGO		Gikobwa	G05	Wet	March				no
INTERFACE	GATSIBO	RWIMBOGO		Gikobwa	G05	Wet	March				no
INTERFACE	GATSIBO	RWIMBOGO		Gikobwa	G05	Wet	March				no
INTERFACE	GATSIBO	RWIMBOGO		Gikobwa	G05	Wet	March				no
INTERFACE	GATSIBO	RWIMBOGO		Gikobwa	G05	Wet	April				no
INTERFACE	GATSIBO	RWIMBOGO		Gikobwa	G05	Wet	April				no
INTERFACE	GATSIBO	RWIMBOGO		Gikobwa	G05	Wet	April				no
INTERFACE	GATSIBO	RWIMBOGO		Gikobwa	G05	Wet	April				no
INTERFACE	GATSIBO	RWIMBOGO		Gikobwa	G05	Wet	May				no
INTERFACE	GATSIBO	RWIMBOGO		Gikobwa	G05	Wet	May				no
INTERFACE	GATSIBO	RWIMBOGO		Gikobwa	G05	Wet	May				no
INTERFACE	GATSIBO	RWIMBOGO		Gikobwa	G05	Wet	May				no
INTERFACE	GATSIBO	RWIMBOGO		Gikobwa	G06	Dry	June				no		Stomoxys	30.5506	-1.59329	Woodland
INTERFACE	GATSIBO	RWIMBOGO		Gikobwa	G06	Dry	June				no
INTERFACE	GATSIBO	RWIMBOGO		Gikobwa	G06	Dry	June				no
INTERFACE	GATSIBO	RWIMBOGO		Gikobwa	G06	Dry	june				no
INTERFACE	GATSIBO	RWIMBOGO		Gikobwa	G06	Dry	July				no
INTERFACE	GATSIBO	RWIMBOGO		Gikobwa	G06	Dry	July				no
INTERFACE	GATSIBO	RWIMBOGO		Gikobwa	G06	Dry	July				no
INTERFACE	GATSIBO	RWIMBOGO		Gikobwa	G06	Dry	July				no
INTERFACE	GATSIBO	RWIMBOGO		Gikobwa	G06	Dry	August				no
INTERFACE	GATSIBO	RWIMBOGO		Gikobwa	G06	Dry	August				no
INTERFACE	GATSIBO	RWIMBOGO		Gikobwa	G06	Dry	August				no
INTERFACE	GATSIBO	RWIMBOGO		Gikobwa	G06	Dry	August				no
INTERFACE	GATSIBO	RWIMBOGO		Gikobwa	G06	Wet	March				no
INTERFACE	GATSIBO	RWIMBOGO		Gikobwa	G06	Wet	March				no
INTERFACE	GATSIBO	RWIMBOGO		Gikobwa	G06	Wet	March				no
INTERFACE	GATSIBO	RWIMBOGO		Gikobwa	G06	Wet	March				no
INTERFACE	GATSIBO	RWIMBOGO		Gikobwa	G06	Wet	April				no
INTERFACE	GATSIBO	RWIMBOGO		Gikobwa	G06	Wet	April				no
INTERFACE	GATSIBO	RWIMBOGO		Gikobwa	G06	Wet	April				no
INTERFACE	GATSIBO	RWIMBOGO		Gikobwa	G06	Wet	April				no
INTERFACE	GATSIBO	RWIMBOGO		Gikobwa	G06	Wet	May				no
INTERFACE	GATSIBO	RWIMBOGO		Gikobwa	G06	Wet	May				no
INTERFACE	GATSIBO	RWIMBOGO		Gikobwa	G06	Wet	May				no
INTERFACE	GATSIBO	RWIMBOGO		Gikobwa	G06	Wet	May				no
INTERFACE	GATSIBO	RWIMBOGO		Gikobwa	G06	Dry	June				no
INTERFACE	GATSIBO	RWIMBOGO		Gikobwa	G06	Dry	June				no
INTERFACE	GATSIBO	RWIMBOGO		Gikobwa	G06	Dry	June				no
INTERFACE	GATSIBO	RWIMBOGO		Gikobwa	G06	Dry	june				no
INTERFACE	GATSIBO	RWIMBOGO		Gikobwa	G06	Dry	July				no
INTERFACE	GATSIBO	RWIMBOGO		Gikobwa	G06	Dry	July				no
INTERFACE	GATSIBO	RWIMBOGO		Gikobwa	G06	Dry	July				no
INTERFACE	GATSIBO	RWIMBOGO		Gikobwa	G06	Dry	July				no
INTERFACE	GATSIBO	RWIMBOGO		Gikobwa	G06	Dry	August				no
INTERFACE	GATSIBO	RWIMBOGO		Gikobwa	G06	Dry	August				no
INTERFACE	GATSIBO	RWIMBOGO		Gikobwa	G06	Dry	August				no
INTERFACE	GATSIBO	RWIMBOGO		Gikobwa	G06	Dry	August				no
INTERFACE	GATSIBO	RWIMBOGO		Gikobwa	G06	Wet	March				no
INTERFACE	GATSIBO	RWIMBOGO		Gikobwa	G06	Wet	March				no
INTERFACE	GATSIBO	RWIMBOGO		Gikobwa	G06	Wet	March				no
INTERFACE	GATSIBO	RWIMBOGO		Gikobwa	G06	Wet	March				no
INTERFACE	GATSIBO	RWIMBOGO		Gikobwa	G06	Wet	April				no
INTERFACE	GATSIBO	RWIMBOGO		Gikobwa	G06	Wet	April				no
INTERFACE	GATSIBO	RWIMBOGO		Gikobwa	G06	Wet	April				no
INTERFACE	GATSIBO	RWIMBOGO		Gikobwa	G06	Wet	April				no
INTERFACE	GATSIBO	RWIMBOGO		Gikobwa	G06	Wet	May				no
INTERFACE	GATSIBO	RWIMBOGO		Gikobwa	G06	Wet	May				no
INTERFACE	GATSIBO	RWIMBOGO		Gikobwa	G06	Wet	May				no
INTERFACE	GATSIBO	RWIMBOGO		Gikobwa	G06	Wet	May				no
INTERFACE	GATSIBO	KABARORE		Nyarukiri	G07	Dry	June				no		Stomoxys	30.2809	-1.35424	Woodland
INTERFACE	GATSIBO	KABARORE		Nyarukiri	G07	Dry	June				no
INTERFACE	GATSIBO	KABARORE		Nyarukiri	G07	Dry	June				no
INTERFACE	GATSIBO	KABARORE		Nyarukiri	G07	Dry	june				no
INTERFACE	GATSIBO	KABARORE		Nyarukiri	G07	Dry	July				no
INTERFACE	GATSIBO	KABARORE		Nyarukiri	G07	Dry	July				no
INTERFACE	GATSIBO	KABARORE		Nyarukiri	G07	Dry	July				no
INTERFACE	GATSIBO	KABARORE		Nyarukiri	G07	Dry	July				no
INTERFACE	GATSIBO	KABARORE		Nyarukiri	G07	Dry	August				no
INTERFACE	GATSIBO	KABARORE		Nyarukiri	G07	Dry	August				no
INTERFACE	GATSIBO	KABARORE		Nyarukiri	G07	Dry	August				no
INTERFACE	GATSIBO	KABARORE		Nyarukiri	G07	Dry	August				no
INTERFACE	GATSIBO	KABARORE		Nyarukiri	G07	Wet	March				no
INTERFACE	GATSIBO	KABARORE		Nyarukiri	G07	Wet	March				no
INTERFACE	GATSIBO	KABARORE		Nyarukiri	G07	Wet	March				no
INTERFACE	GATSIBO	KABARORE		Nyarukiri	G07	Wet	March				no
INTERFACE	GATSIBO	KABARORE		Nyarukiri	G07	Wet	April				no
INTERFACE	GATSIBO	KABARORE		Nyarukiri	G07	Wet	April				no
INTERFACE	GATSIBO	KABARORE		Nyarukiri	G07	Wet	April				no
INTERFACE	GATSIBO	KABARORE		Nyarukiri	G07	Wet	April				no
INTERFACE	GATSIBO	KABARORE		Nyarukiri	G07	Wet	May				no
INTERFACE	GATSIBO	KABARORE		Nyarukiri	G07	Wet	May				no
INTERFACE	GATSIBO	KABARORE		Nyarukiri	G07	Wet	May				no
INTERFACE	GATSIBO	KABARORE		Nyarukiri	G07	Wet	May				no
INTERFACE	KAYONZA	MURUNDI		Mucucu II	MUR01	Dry	June	5	Gp	M	yes	yes	Tabanids, Stomoxys	30.6293	-1.62311	Woodland
INTERFACE	KAYONZA	MURUNDI		Mucucu II	MUR01	Dry	June	9	Gp	F	yes	yes
INTERFACE	KAYONZA	MURUNDI		Mucucu II	MUR01	Dry	June	1	Gmc	M	yes	yes
INTERFACE	KAYONZA	MURUNDI		Mucucu II	MUR01	Dry	june	4	Gmc	F	yes	yes
INTERFACE	KAYONZA	MURUNDI		Mucucu II	MUR01	Dry	July				no
INTERFACE	KAYONZA	MURUNDI		Mucucu II	MUR01	Dry	July				no
INTERFACE	KAYONZA	MURUNDI		Mucucu II	MUR01	Dry	July				no
INTERFACE	KAYONZA	MURUNDI		Mucucu II	MUR01	Dry	July				no
INTERFACE	KAYONZA	MURUNDI		Mucucu II	MUR01	Dry	August				no
INTERFACE	KAYONZA	MURUNDI		Mucucu II	MUR01	Dry	August	2	Gp	F	yes	yes
INTERFACE	KAYONZA	MURUNDI		Mucucu II	MUR01	Dry	August	1	Gmc	M	yes	yes
INTERFACE	KAYONZA	MURUNDI		Mucucu II	MUR01	Dry	August				no
INTERFACE	KAYONZA	MURUNDI		Mucucu II	MUR01	Wet	March				no
INTERFACE	KAYONZA	MURUNDI		Mucucu II	MUR01	Wet	March	6	Gp	F	yes	no
INTERFACE	KAYONZA	MURUNDI		Mucucu II	MUR01	Wet	March				no
INTERFACE	KAYONZA	MURUNDI		Mucucu II	MUR01	Wet	March				no
INTERFACE	KAYONZA	MURUNDI		Mucucu II	MUR01	Wet	April	4	Gp	M	yes	yes
INTERFACE	KAYONZA	MURUNDI		Mucucu II	MUR01	Wet	April	7	Gp	F	yes	yes
INTERFACE	KAYONZA	MURUNDI		Mucucu II	MUR01	Wet	April	1	Gmc	M	yes	yes
INTERFACE	KAYONZA	MURUNDI		Mucucu II	MUR01	Wet	April				no
INTERFACE	KAYONZA	MURUNDI		Mucucu II	MUR01	Wet	May	2	Gp	M	yes	no
INTERFACE	KAYONZA	MURUNDI		Mucucu II	MUR01	Wet	May	6	Gp	F	yes	no
INTERFACE	KAYONZA	MURUNDI		Mucucu II	MUR01	Wet	May				no
INTERFACE	KAYONZA	MURUNDI		Mucucu II	MUR01	Wet	May				no
INTERFACE	KAYONZA	MURUNDI		Mucucu II	MUR02	Dry	June				no		Stomoxys	30.577	-1.64358	open Woodland
INTERFACE	KAYONZA	MURUNDI		Mucucu II	MUR02	Dry	June				no
INTERFACE	KAYONZA	MURUNDI		Mucucu II	MUR02	Dry	June				no
INTERFACE	KAYONZA	MURUNDI		Mucucu II	MUR02	Dry	june				no
INTERFACE	KAYONZA	MURUNDI		Mucucu II	MUR02	Dry	July				no
INTERFACE	KAYONZA	MURUNDI		Mucucu II	MUR02	Dry	July				no
INTERFACE	KAYONZA	MURUNDI		Mucucu II	MUR02	Dry	July				no
INTERFACE	KAYONZA	MURUNDI		Mucucu II	MUR02	Dry	July				no
INTERFACE	KAYONZA	MURUNDI		Mucucu II	MUR02	Dry	August				no
INTERFACE	KAYONZA	MURUNDI		Mucucu II	MUR02	Dry	August				no
INTERFACE	KAYONZA	MURUNDI		Mucucu II	MUR02	Dry	August				no
INTERFACE	KAYONZA	MURUNDI		Mucucu II	MUR02	Dry	August				no
INTERFACE	KAYONZA	MURUNDI		Mucucu II	MUR02	Wet	March				no
INTERFACE	KAYONZA	MURUNDI		Mucucu II	MUR02	Wet	March				no
INTERFACE	KAYONZA	MURUNDI		Mucucu II	MUR02	Wet	March				no
INTERFACE	KAYONZA	MURUNDI		Mucucu II	MUR02	Wet	March				no
INTERFACE	KAYONZA	MURUNDI		Mucucu II	MUR02	Wet	April				no
INTERFACE	KAYONZA	MURUNDI		Mucucu II	MUR02	Wet	April				no
INTERFACE	KAYONZA	MURUNDI		Mucucu II	MUR02	Wet	April				no
INTERFACE	KAYONZA	MURUNDI		Mucucu II	MUR02	Wet	April				no
INTERFACE	KAYONZA	MURUNDI		Mucucu II	MUR02	Wet	May				no
INTERFACE	KAYONZA	MURUNDI		Mucucu II	MUR02	Wet	May				no
INTERFACE	KAYONZA	MURUNDI		Mucucu II	MUR02	Wet	May				no
INTERFACE	KAYONZA	MURUNDI		Mucucu II	MUR02	Wet	May				no
INTERFACE	KAYONZA	MURUNDI		Mucucu II	MUR03	Dry	June	2	Gp	M	yes	no	Stomoxys, Tabanids	30.6417	-1.6561	Woodland
INTERFACE	KAYONZA	MURUNDI		Mucucu II	MUR03	Dry	June	5	Gp	F	yes	no
INTERFACE	KAYONZA	MURUNDI		Mucucu II	MUR03	Dry	June				no
INTERFACE	KAYONZA	MURUNDI		Mucucu II	MUR03	Dry	june				no
INTERFACE	KAYONZA	MURUNDI		Mucucu II	MUR03	Dry	July				no
INTERFACE	KAYONZA	MURUNDI		Mucucu II	MUR03	Dry	July				no
INTERFACE	KAYONZA	MURUNDI		Mucucu II	MUR03	Dry	July				no
INTERFACE	KAYONZA	MURUNDI		Mucucu II	MUR03	Dry	July				no
INTERFACE	KAYONZA	MURUNDI		Mucucu II	MUR03	Dry	August				no
INTERFACE	KAYONZA	MURUNDI		Mucucu II	MUR03	Dry	August				no
INTERFACE	KAYONZA	MURUNDI		Mucucu II	MUR03	Dry	August				no
INTERFACE	KAYONZA	MURUNDI		Mucucu II	MUR03	Dry	August				no
INTERFACE	KAYONZA	MURUNDI		Mucucu II	MUR03	Wet	March				no
INTERFACE	KAYONZA	MURUNDI		Mucucu II	MUR03	Wet	March				no
INTERFACE	KAYONZA	MURUNDI		Mucucu II	MUR03	Wet	March				no
INTERFACE	KAYONZA	MURUNDI		Mucucu II	MUR03	Wet	March				no
INTERFACE	KAYONZA	MURUNDI		Mucucu II	MUR03	Wet	April	3	Gp	M	yes	yes
INTERFACE	KAYONZA	MURUNDI		Mucucu II	MUR03	Wet	April	6	Gp	F	yes	yes
INTERFACE	KAYONZA	MURUNDI		Mucucu II	MUR03	Wet	April				no
INTERFACE	KAYONZA	MURUNDI		Mucucu II	MUR03	Wet	April	2	Gmc	F	yes	yes
INTERFACE	KAYONZA	MURUNDI		Mucucu II	MUR03	Wet	May				no
INTERFACE	KAYONZA	MURUNDI		Mucucu II	MUR03	Wet	May				no
INTERFACE	KAYONZA	MURUNDI		Mucucu II	MUR03	Wet	May				no
INTERFACE	KAYONZA	MURUNDI		Mucucu II	MUR03	Wet	May				no
INTERFACE	KAYONZA	MURUNDI		Mucucu II	MUR04	Dry	June				no		Stomoxys	30.5764	-1.69437	open grassland
INTERFACE	KAYONZA	MURUNDI		Mucucu II	MUR04	Dry	June				no
INTERFACE	KAYONZA	MURUNDI		Mucucu II	MUR04	Dry	June				no
INTERFACE	KAYONZA	MURUNDI		Mucucu II	MUR04	Dry	june				no
INTERFACE	KAYONZA	MURUNDI		Mucucu II	MUR04	Dry	July				no
INTERFACE	KAYONZA	MURUNDI		Mucucu II	MUR04	Dry	July				no
INTERFACE	KAYONZA	MURUNDI		Mucucu II	MUR04	Dry	July				no
INTERFACE	KAYONZA	MURUNDI		Mucucu II	MUR04	Dry	July				no
INTERFACE	KAYONZA	MURUNDI		Mucucu II	MUR04	Dry	August				no
INTERFACE	KAYONZA	MURUNDI		Mucucu II	MUR04	Dry	August				no
INTERFACE	KAYONZA	MURUNDI		Mucucu II	MUR04	Dry	August				no
INTERFACE	KAYONZA	MURUNDI		Mucucu II	MUR04	Dry	August				no
INTERFACE	KAYONZA	MURUNDI		Mucucu II	MUR04	Wet	March				no
INTERFACE	KAYONZA	MURUNDI		Mucucu II	MUR04	Wet	March				no
INTERFACE	KAYONZA	MURUNDI		Mucucu II	MUR04	Wet	March				no
INTERFACE	KAYONZA	MURUNDI		Mucucu II	MUR04	Wet	March				no
INTERFACE	KAYONZA	MURUNDI		Mucucu II	MUR04	Wet	April				no
INTERFACE	KAYONZA	MURUNDI		Mucucu II	MUR04	Wet	April				no
INTERFACE	KAYONZA	MURUNDI		Mucucu II	MUR04	Wet	April				no
INTERFACE	KAYONZA	MURUNDI		Mucucu II	MUR04	Wet	April				no
INTERFACE	KAYONZA	MURUNDI		Mucucu II	MUR04	Wet	May				no
INTERFACE	KAYONZA	MURUNDI		Mucucu II	MUR04	Wet	May				no
INTERFACE	KAYONZA	MURUNDI		Mucucu II	MUR04	Wet	May				no
INTERFACE	KAYONZA	MURUNDI		Mucucu II	MUR04	Wet	May				no
INTERFACE	KAYONZA	MURUNDI		Mucucu II	MUR04	Dry	June				no
INTERFACE	KAYONZA	MURUNDI		Mucucu II	MUR04	Dry	June				no
INTERFACE	KAYONZA	MURUNDI		Mucucu II	MUR04	Dry	June				no
INTERFACE	KAYONZA	MURUNDI		Mucucu II	MUR04	Dry	june				no
INTERFACE	KAYONZA	MURUNDI		Mucucu II	MUR04	Dry	July				no
INTERFACE	KAYONZA	MURUNDI		Mucucu II	MUR04	Dry	July				no
INTERFACE	KAYONZA	MURUNDI		Mucucu II	MUR04	Dry	July				no
INTERFACE	KAYONZA	MURUNDI		Mucucu II	MUR04	Dry	July				no
INTERFACE	KAYONZA	MURUNDI		Mucucu II	MUR04	Dry	August				no
INTERFACE	KAYONZA	MURUNDI		Mucucu II	MUR04	Dry	August				no
INTERFACE	KAYONZA	MURUNDI		Mucucu II	MUR04	Dry	August				no
INTERFACE	KAYONZA	MURUNDI		Mucucu II	MUR04	Dry	August				no
INTERFACE	KAYONZA	MURUNDI		Mucucu II	MUR04	Wet	March				no
INTERFACE	KAYONZA	MURUNDI		Mucucu II	MUR04	Wet	March				no
INTERFACE	KAYONZA	MURUNDI		Mucucu II	MUR04	Wet	March				no
INTERFACE	KAYONZA	MURUNDI		Mucucu II	MUR04	Wet	March				no
INTERFACE	KAYONZA	MURUNDI		Mucucu II	MUR04	Wet	April				no
INTERFACE	KAYONZA	MURUNDI		Mucucu II	MUR04	Wet	April				no
INTERFACE	KAYONZA	MURUNDI		Mucucu II	MUR04	Wet	April				no
INTERFACE	KAYONZA	MURUNDI		Mucucu II	MUR04	Wet	April				no
INTERFACE	KAYONZA	MURUNDI		Mucucu II	MUR04	Wet	May				no
INTERFACE	KAYONZA	MURUNDI		Mucucu II	MUR04	Wet	May				no
INTERFACE	KAYONZA	MURUNDI		Mucucu II	MUR04	Wet	May				no
INTERFACE	KAYONZA	MURUNDI		Mucucu II	MUR04	Wet	May				no
INTERFACE	KAYONZA	MURUNDI		Buhabwa	MUR05	Dry	June				no		Stomoxys	30.3414	-1.40867	Grassland
INTERFACE	KAYONZA	MURUNDI		Buhabwa	MUR05	Dry	June				no
INTERFACE	KAYONZA	MURUNDI		Buhabwa	MUR05	Dry	June				no
INTERFACE	KAYONZA	MURUNDI		Buhabwa	MUR05	Dry	june				no
INTERFACE	KAYONZA	MURUNDI		Buhabwa	MUR05	Dry	July				no
INTERFACE	KAYONZA	MURUNDI		Buhabwa	MUR05	Dry	July				no
INTERFACE	KAYONZA	MURUNDI		Buhabwa	MUR05	Dry	July				no
INTERFACE	KAYONZA	MURUNDI		Buhabwa	MUR05	Dry	July				no
INTERFACE	KAYONZA	MURUNDI		Buhabwa	MUR05	Dry	August				no
INTERFACE	KAYONZA	MURUNDI		Buhabwa	MUR05	Dry	August				no
INTERFACE	KAYONZA	MURUNDI		Buhabwa	MUR05	Dry	August				no
INTERFACE	KAYONZA	MURUNDI		Buhabwa	MUR05	Dry	August				no
INTERFACE	KAYONZA	MURUNDI		Buhabwa	MUR05	Wet	March				no
INTERFACE	KAYONZA	MURUNDI		Buhabwa	MUR05	Wet	March				no
INTERFACE	KAYONZA	MURUNDI		Buhabwa	MUR05	Wet	March				no
INTERFACE	KAYONZA	MURUNDI		Buhabwa	MUR05	Wet	March				no
INTERFACE	KAYONZA	MURUNDI		Buhabwa	MUR05	Wet	April				no
INTERFACE	KAYONZA	MURUNDI		Buhabwa	MUR05	Wet	April				no
INTERFACE	KAYONZA	MURUNDI		Buhabwa	MUR05	Wet	April				no
INTERFACE	KAYONZA	MURUNDI		Buhabwa	MUR05	Wet	April				no
INTERFACE	KAYONZA	MURUNDI		Buhabwa	MUR05	Wet	May				no
INTERFACE	KAYONZA	MURUNDI		Buhabwa	MUR05	Wet	May				no
INTERFACE	KAYONZA	MURUNDI		Buhabwa	MUR05	Wet	May				no
INTERFACE	KAYONZA	MURUNDI		Buhabwa	MUR05	Wet	May				no
INTERFACE	KAYONZA	GAHINI		Kirimbari	GAH01	Dry	June	3	Gp	M	yes	no	Tabanids, Stomoxys	30.6177	-1.69238	Woodland
INTERFACE	KAYONZA	GAHINI		Kirimbari	GAH01	Dry	June	8	Gp	F	yes	no
INTERFACE	KAYONZA	GAHINI		Kirimbari	GAH01	Dry	June				no
INTERFACE	KAYONZA	GAHINI		Kirimbari	GAH01	Dry	june				no
INTERFACE	KAYONZA	GAHINI		Kirimbari	GAH01	Dry	July				no
INTERFACE	KAYONZA	GAHINI		Kirimbari	GAH01	Dry	July				no
INTERFACE	KAYONZA	GAHINI		Kirimbari	GAH01	Dry	July				no
INTERFACE	KAYONZA	GAHINI		Kirimbari	GAH01	Dry	July				no
INTERFACE	KAYONZA	GAHINI		Kirimbari	GAH01	Dry	August				no
INTERFACE	KAYONZA	GAHINI		Kirimbari	GAH01	Dry	August				no
INTERFACE	KAYONZA	GAHINI		Kirimbari	GAH01	Dry	August				no
INTERFACE	KAYONZA	GAHINI		Kirimbari	GAH01	Dry	August				no
INTERFACE	KAYONZA	GAHINI		Kirimbari	GAH01	Wet	March	7	Gp	M	yes	no
INTERFACE	KAYONZA	GAHINI		Kirimbari	GAH01	Wet	March	10	Gp	F	yes	no
INTERFACE	KAYONZA	GAHINI		Kirimbari	GAH01	Wet	March				no
INTERFACE	KAYONZA	GAHINI		Kirimbari	GAH01	Wet	March				no
INTERFACE	KAYONZA	GAHINI		Kirimbari	GAH01	Wet	April	15	Gp	M	yes	yes
INTERFACE	KAYONZA	GAHINI		Kirimbari	GAH01	Wet	April	23	Gp	F	yes	yes
INTERFACE	KAYONZA	GAHINI		Kirimbari	GAH01	Wet	April	2	Gmc	M	yes	yes
INTERFACE	KAYONZA	GAHINI		Kirimbari	GAH01	Wet	April	6	Gmc	F	yes	yes
INTERFACE	KAYONZA	GAHINI		Kirimbari	GAH01	Wet	May	6	Gp	M	yes	yes
INTERFACE	KAYONZA	GAHINI		Kirimbari	GAH01	Wet	May	11	Gp	F	yes	yes
INTERFACE	KAYONZA	GAHINI		Kirimbari	GAH01	Wet	May				no
INTERFACE	KAYONZA	GAHINI		Kirimbari	GAH01	Wet	May	2	Gmc	F	yes	yes
INTERFACE	KAYONZA	GAHINI		Kirimbari	GAH02	Dry	June				no		Tabanids+stomoxys	30.6064	-1.75549	open Woodland
INTERFACE	KAYONZA	GAHINI		Kirimbari	GAH02	Dry	June				no
INTERFACE	KAYONZA	GAHINI		Kirimbari	GAH02	Dry	June				no
INTERFACE	KAYONZA	GAHINI		Kirimbari	GAH02	Dry	june				no
INTERFACE	KAYONZA	GAHINI		Kirimbari	GAH02	Dry	July				no
INTERFACE	KAYONZA	GAHINI		Kirimbari	GAH02	Dry	July				no
INTERFACE	KAYONZA	GAHINI		Kirimbari	GAH02	Dry	July				no
INTERFACE	KAYONZA	GAHINI		Kirimbari	GAH02	Dry	July				no
INTERFACE	KAYONZA	GAHINI		Kirimbari	GAH02	Dry	August				no
INTERFACE	KAYONZA	GAHINI		Kirimbari	GAH02	Dry	August				no
INTERFACE	KAYONZA	GAHINI		Kirimbari	GAH02	Dry	August				no
INTERFACE	KAYONZA	GAHINI		Kirimbari	GAH02	Dry	August				no
INTERFACE	KAYONZA	GAHINI		Kirimbari	GAH02	Wet	March				no
INTERFACE	KAYONZA	GAHINI		Kirimbari	GAH02	Wet	March				no
INTERFACE	KAYONZA	GAHINI		Kirimbari	GAH02	Wet	March				no
INTERFACE	KAYONZA	GAHINI		Kirimbari	GAH02	Wet	March				no
INTERFACE	KAYONZA	GAHINI		Kirimbari	GAH02	Wet	April				no
INTERFACE	KAYONZA	GAHINI		Kirimbari	GAH02	Wet	April				no
INTERFACE	KAYONZA	GAHINI		Kirimbari	GAH02	Wet	April				no
INTERFACE	KAYONZA	GAHINI		Kirimbari	GAH02	Wet	April				no
INTERFACE	KAYONZA	GAHINI		Kirimbari	GAH02	Wet	May				no
INTERFACE	KAYONZA	GAHINI		Kirimbari	GAH02	Wet	May				no
INTERFACE	KAYONZA	GAHINI		Kirimbari	GAH02	Wet	May				no
INTERFACE	KAYONZA	GAHINI		Kirimbari	GAH02	Wet	May				no
INTERFACE	KAYONZA	GAHINI		Kirimbari	GAH03	Dry	June	8	Gp	M	yes	no	Stomoxys	30.6364	-1.73071	Woodland
INTERFACE	KAYONZA	GAHINI		Kirimbari	GAH03	Dry	June	15	Gp	F	yes	no
INTERFACE	KAYONZA	GAHINI		Kirimbari	GAH03	Dry	June				no
INTERFACE	KAYONZA	GAHINI		Kirimbari	GAH03	Dry	june				no
INTERFACE	KAYONZA	GAHINI		Kirimbari	GAH03	Dry	July				no
INTERFACE	KAYONZA	GAHINI		Kirimbari	GAH03	Dry	July				no
INTERFACE	KAYONZA	GAHINI		Kirimbari	GAH03	Dry	July				no
INTERFACE	KAYONZA	GAHINI		Kirimbari	GAH03	Dry	July				no
INTERFACE	KAYONZA	GAHINI		Kirimbari	GAH03	Dry	August				no
INTERFACE	KAYONZA	GAHINI		Kirimbari	GAH03	Dry	August				no
INTERFACE	KAYONZA	GAHINI		Kirimbari	GAH03	Dry	August				no
INTERFACE	KAYONZA	GAHINI		Kirimbari	GAH03	Dry	August				no
INTERFACE	KAYONZA	GAHINI		Kirimbari	GAH03	Wet	March	1	Gp	M	yes	no
INTERFACE	KAYONZA	GAHINI		Kirimbari	GAH03	Wet	March	4	Gp	F	yes	no
INTERFACE	KAYONZA	GAHINI		Kirimbari	GAH03	Wet	March				no
INTERFACE	KAYONZA	GAHINI		Kirimbari	GAH03	Wet	March				no
INTERFACE	KAYONZA	GAHINI		Kirimbari	GAH03	Wet	April	6	Gp	M	yes	yes
INTERFACE	KAYONZA	GAHINI		Kirimbari	GAH03	Wet	April	10	Gp	F	yes	yes
INTERFACE	KAYONZA	GAHINI		Kirimbari	GAH03	Wet	April				no
INTERFACE	KAYONZA	GAHINI		Kirimbari	GAH03	Wet	April	3	Gmc	F	yes	yes
INTERFACE	KAYONZA	GAHINI		Kirimbari	GAH03	Wet	May	2	Gp	M	yes
INTERFACE	KAYONZA	GAHINI		Kirimbari	GAH03	Wet	May	5	Gp	F	yes
INTERFACE	KAYONZA	GAHINI		Kirimbari	GAH03	Wet	May				no
INTERFACE	KAYONZA	GAHINI		Kirimbari	GAH03	Wet	May				no
INTERFACE	KAYONZA	GAHINI		Kirimbari	GAH04	Dry	June				no		Stomoxys	30.6289	-1.82156	Woodland
INTERFACE	KAYONZA	GAHINI		Kirimbari	GAH04	Dry	June				no
INTERFACE	KAYONZA	GAHINI		Kirimbari	GAH04	Dry	June				no
INTERFACE	KAYONZA	GAHINI		Kirimbari	GAH04	Dry	june				no
INTERFACE	KAYONZA	GAHINI		Kirimbari	GAH04	Dry	July				no
INTERFACE	KAYONZA	GAHINI		Kirimbari	GAH04	Dry	July				no
INTERFACE	KAYONZA	GAHINI		Kirimbari	GAH04	Dry	July				no
INTERFACE	KAYONZA	GAHINI		Kirimbari	GAH04	Dry	July				no
INTERFACE	KAYONZA	GAHINI		Kirimbari	GAH04	Dry	August				no
INTERFACE	KAYONZA	GAHINI		Kirimbari	GAH04	Dry	August				no
INTERFACE	KAYONZA	GAHINI		Kirimbari	GAH04	Dry	August				no
INTERFACE	KAYONZA	GAHINI		Kirimbari	GAH04	Dry	August				no
INTERFACE	KAYONZA	GAHINI		Kirimbari	GAH04	Wet	March				no
INTERFACE	KAYONZA	GAHINI		Kirimbari	GAH04	Wet	March				no
INTERFACE	KAYONZA	GAHINI		Kirimbari	GAH04	Wet	March				no
INTERFACE	KAYONZA	GAHINI		Kirimbari	GAH04	Wet	March				no
INTERFACE	KAYONZA	GAHINI		Kirimbari	GAH04	Wet	April				no
INTERFACE	KAYONZA	GAHINI		Kirimbari	GAH04	Wet	April				no
INTERFACE	KAYONZA	GAHINI		Kirimbari	GAH04	Wet	April				no
INTERFACE	KAYONZA	GAHINI		Kirimbari	GAH04	Wet	April				no
INTERFACE	KAYONZA	GAHINI		Kirimbari	GAH04	Wet	May				no
INTERFACE	KAYONZA	GAHINI		Kirimbari	GAH04	Wet	May				no
INTERFACE	KAYONZA	GAHINI		Kirimbari	GAH04	Wet	May				no
INTERFACE	KAYONZA	GAHINI		Kirimbari	GAH04	Wet	May				no
INTERFACE	KAYONZA	GAHINI		Mugiprefe	GAH05	Dry	June				no		Stomoxys	30.3755	-1.46092	open Woodland
INTERFACE	KAYONZA	GAHINI		Mugiprefe	GAH05	Dry	June				no
INTERFACE	KAYONZA	GAHINI		Mugiprefe	GAH05	Dry	June				no
INTERFACE	KAYONZA	GAHINI		Mugiprefe	GAH05	Dry	june				no
INTERFACE	KAYONZA	GAHINI		Mugiprefe	GAH05	Dry	July				no
INTERFACE	KAYONZA	GAHINI		Mugiprefe	GAH05	Dry	July				no
INTERFACE	KAYONZA	GAHINI		Mugiprefe	GAH05	Dry	July				no
INTERFACE	KAYONZA	GAHINI		Mugiprefe	GAH05	Dry	July				no
INTERFACE	KAYONZA	GAHINI		Mugiprefe	GAH05	Dry	August				no
INTERFACE	KAYONZA	GAHINI		Mugiprefe	GAH05	Dry	August				no
INTERFACE	KAYONZA	GAHINI		Mugiprefe	GAH05	Dry	August				no
INTERFACE	KAYONZA	GAHINI		Mugiprefe	GAH05	Dry	August				no
INTERFACE	KAYONZA	GAHINI		Mugiprefe	GAH05	Wet	March				no
INTERFACE	KAYONZA	GAHINI		Mugiprefe	GAH05	Wet	March				no
INTERFACE	KAYONZA	GAHINI		Mugiprefe	GAH05	Wet	March				no
INTERFACE	KAYONZA	GAHINI		Mugiprefe	GAH05	Wet	March				no
INTERFACE	KAYONZA	GAHINI		Mugiprefe	GAH05	Wet	April				no
INTERFACE	KAYONZA	GAHINI		Mugiprefe	GAH05	Wet	April				no
INTERFACE	KAYONZA	GAHINI		Mugiprefe	GAH05	Wet	April				no
INTERFACE	KAYONZA	GAHINI		Mugiprefe	GAH05	Wet	April				no
INTERFACE	KAYONZA	GAHINI		Mugiprefe	GAH05	Wet	May				no
INTERFACE	KAYONZA	GAHINI		Mugiprefe	GAH05	Wet	May				no
INTERFACE	KAYONZA	GAHINI		Mugiprefe	GAH05	Wet	May				no
INTERFACE	KAYONZA	GAHINI		Mugiprefe	GAH05	Wet	May				no
INTERFACE	KAYONZA	MWILI		Kageyo	MW01	Dry	June	4	Gp	M	yes	yes	Stomoxys, Tabanids, Keds	30.66	-1.78054	Woodland
INTERFACE	KAYONZA	MWILI		Kageyo	MW01	Dry	June	8	Gp	F	yes	yes
INTERFACE	KAYONZA	MWILI		Kageyo	MW01	Dry	June	1	Gmc	M	yes	yes
INTERFACE	KAYONZA	MWILI		Kageyo	MW01	Dry	june	3	Gmc	F	yes	yes
INTERFACE	KAYONZA	MWILI		Kageyo	MW01	Dry	July				no
INTERFACE	KAYONZA	MWILI		Kageyo	MW01	Dry	July	4	Gp	F	yes	no
INTERFACE	KAYONZA	MWILI		Kageyo	MW01	Dry	July				no
INTERFACE	KAYONZA	MWILI		Kageyo	MW01	Dry	July				no
INTERFACE	KAYONZA	MWILI		Kageyo	MW01	Dry	August	1	Gp	M	yes	yes
INTERFACE	KAYONZA	MWILI		Kageyo	MW01	Dry	August	4	Gp	F	yes	yes
INTERFACE	KAYONZA	MWILI		Kageyo	MW01	Dry	August				no
INTERFACE	KAYONZA	MWILI		Kageyo	MW01	Dry	August	2	Gmc	F	yes	yes
INTERFACE	KAYONZA	MWILI		Kageyo	MW01	Wet	March	3	Gp	M	yes	yes
INTERFACE	KAYONZA	MWILI		Kageyo	MW01	Wet	March	6	Gp	F	yes	yes
INTERFACE	KAYONZA	MWILI		Kageyo	MW01	Wet	March	1	Gmc	M	yes	yes
INTERFACE	KAYONZA	MWILI		Kageyo	MW01	Wet	March	1	Gmc	F	yes	yes
INTERFACE	KAYONZA	MWILI		Kageyo	MW01	Wet	April	10	Gp	M	yes	yes
INTERFACE	KAYONZA	MWILI		Kageyo	MW01	Wet	April	19	Gp	F	yes	yes
INTERFACE	KAYONZA	MWILI		Kageyo	MW01	Wet	April	3	Gmc	M	yes	yes
INTERFACE	KAYONZA	MWILI		Kageyo	MW01	Wet	April	5	Gmc	F	yes	yes
INTERFACE	KAYONZA	MWILI		Kageyo	MW01	Wet	May	3	Gp	M	yes	yes
INTERFACE	KAYONZA	MWILI		Kageyo	MW01	Wet	May	8	Gp	F	yes	yes
INTERFACE	KAYONZA	MWILI		Kageyo	MW01	Wet	May	1	Gmc	M	yes	yes
INTERFACE	KAYONZA	MWILI		Kageyo	MW01	Wet	May	4	Gmc	F	yes	yes
INTERFACE	KAYONZA	MWILI		Kageyo	MW02	Dry	June				no		Stomoxys	30.6231	-1.87294	Open grassland
INTERFACE	KAYONZA	MWILI		Kageyo	MW02	Dry	June				no
INTERFACE	KAYONZA	MWILI		Kageyo	MW02	Dry	June				no
INTERFACE	KAYONZA	MWILI		Kageyo	MW02	Dry	june				no
INTERFACE	KAYONZA	MWILI		Kageyo	MW02	Dry	July				no
INTERFACE	KAYONZA	MWILI		Kageyo	MW02	Dry	July				no
INTERFACE	KAYONZA	MWILI		Kageyo	MW02	Dry	July				no
INTERFACE	KAYONZA	MWILI		Kageyo	MW02	Dry	July				no
INTERFACE	KAYONZA	MWILI		Kageyo	MW02	Dry	August				no
INTERFACE	KAYONZA	MWILI		Kageyo	MW02	Dry	August				no
INTERFACE	KAYONZA	MWILI		Kageyo	MW02	Dry	August				no
INTERFACE	KAYONZA	MWILI		Kageyo	MW02	Dry	August				no
INTERFACE	KAYONZA	MWILI		Kageyo	MW02	Wet	March				no
INTERFACE	KAYONZA	MWILI		Kageyo	MW02	Wet	March				no
INTERFACE	KAYONZA	MWILI		Kageyo	MW02	Wet	March				no
INTERFACE	KAYONZA	MWILI		Kageyo	MW02	Wet	March				no
INTERFACE	KAYONZA	MWILI		Kageyo	MW02	Wet	April				no
INTERFACE	KAYONZA	MWILI		Kageyo	MW02	Wet	April				no
INTERFACE	KAYONZA	MWILI		Kageyo	MW02	Wet	April				no
INTERFACE	KAYONZA	MWILI		Kageyo	MW02	Wet	April				no
INTERFACE	KAYONZA	MWILI		Kageyo	MW02	Wet	May				no
INTERFACE	KAYONZA	MWILI		Kageyo	MW02	Wet	May				no
INTERFACE	KAYONZA	MWILI		Kageyo	MW02	Wet	May				no
INTERFACE	KAYONZA	MWILI		Kageyo	MW02	Wet	May				no
INTERFACE	KAYONZA	MWILI		Bikoki	MW03	Dry	June	7	Gp	M	yes	yes	Stomoxys, Tabanids	30.662	-1.84407	Woodland
INTERFACE	KAYONZA	MWILI		Bikoki	MW03	Dry	June	11	Gp	F	yes	yes
INTERFACE	KAYONZA	MWILI		Bikoki	MW03	Dry	June	1	Gmc	M	yes	yes
INTERFACE	KAYONZA	MWILI		Bikoki	MW03	Dry	june				no
INTERFACE	KAYONZA	MWILI		Bikoki	MW03	Dry	July	1	Gp	M	yes	yes
INTERFACE	KAYONZA	MWILI		Bikoki	MW03	Dry	July	6	Gp	F	yes	yes
INTERFACE	KAYONZA	MWILI		Bikoki	MW03	Dry	July				no
INTERFACE	KAYONZA	MWILI		Bikoki	MW03	Dry	July	1	Gmc	F	yes	yes
INTERFACE	KAYONZA	MWILI		Bikoki	MW03	Dry	August				no
INTERFACE	KAYONZA	MWILI		Bikoki	MW03	Dry	August	3	Gp	F	yes	no
INTERFACE	KAYONZA	MWILI		Bikoki	MW03	Dry	August				no
INTERFACE	KAYONZA	MWILI		Bikoki	MW03	Dry	August				no
INTERFACE	KAYONZA	MWILI		Bikoki	MW03	Wet	March	7	Gp	M	yes	yes
INTERFACE	KAYONZA	MWILI		Bikoki	MW03	Wet	March	15	Gp	F	yes	yes
INTERFACE	KAYONZA	MWILI		Bikoki	MW03	Wet	March	1	Gmc	M	yes	yes
INTERFACE	KAYONZA	MWILI		Bikoki	MW03	Wet	March	2	Gmc	F	yes	yes
INTERFACE	KAYONZA	MWILI		Bikoki	MW03	Wet	April	66	Gp	M	yes	yes
INTERFACE	KAYONZA	MWILI		Bikoki	MW03	Wet	April	81	Gp	F	yes	yes
INTERFACE	KAYONZA	MWILI		Bikoki	MW03	Wet	April	26	Gmc	M	yes	yes
INTERFACE	KAYONZA	MWILI		Bikoki	MW03	Wet	April	31	Gmc	F	yes	yes
INTERFACE	KAYONZA	MWILI		Bikoki	MW03	Wet	May	15	Gp	M	yes	yes
INTERFACE	KAYONZA	MWILI		Bikoki	MW03	Wet	May	27	Gp	F	yes	yes
INTERFACE	KAYONZA	MWILI		Bikoki	MW03	Wet	May	6	Gmc	M	yes	yes
INTERFACE	KAYONZA	MWILI		Bikoki	MW03	Wet	May	11	Gmc	F	yes	yes
INTERFACE	KAYONZA	MWILI		Bikoki	MW04	Dry	June				no		Stomoxys	30.6411	-1.93449	Grassland with trees
INTERFACE	KAYONZA	MWILI		Bikoki	MW04	Dry	June				no
INTERFACE	KAYONZA	MWILI		Bikoki	MW04	Dry	June				no
INTERFACE	KAYONZA	MWILI		Bikoki	MW04	Dry	june				no
INTERFACE	KAYONZA	MWILI		Bikoki	MW04	Dry	July				no
INTERFACE	KAYONZA	MWILI		Bikoki	MW04	Dry	July				no
INTERFACE	KAYONZA	MWILI		Bikoki	MW04	Dry	July				no
INTERFACE	KAYONZA	MWILI		Bikoki	MW04	Dry	July				no
INTERFACE	KAYONZA	MWILI		Bikoki	MW04	Dry	August				no
INTERFACE	KAYONZA	MWILI		Bikoki	MW04	Dry	August				no
INTERFACE	KAYONZA	MWILI		Bikoki	MW04	Dry	August				no
INTERFACE	KAYONZA	MWILI		Bikoki	MW04	Dry	August				no
INTERFACE	KAYONZA	MWILI		Bikoki	MW04	Wet	March				no
INTERFACE	KAYONZA	MWILI		Bikoki	MW04	Wet	March				no
INTERFACE	KAYONZA	MWILI		Bikoki	MW04	Wet	March				no
INTERFACE	KAYONZA	MWILI		Bikoki	MW04	Wet	March				no
INTERFACE	KAYONZA	MWILI		Bikoki	MW04	Wet	April				no
INTERFACE	KAYONZA	MWILI		Bikoki	MW04	Wet	April				no
INTERFACE	KAYONZA	MWILI		Bikoki	MW04	Wet	April				no
INTERFACE	KAYONZA	MWILI		Bikoki	MW04	Wet	April				no
INTERFACE	KAYONZA	MWILI		Bikoki	MW04	Wet	May				no
INTERFACE	KAYONZA	MWILI		Bikoki	MW04	Wet	May				no
INTERFACE	KAYONZA	MWILI		Bikoki	MW04	Wet	May				no
INTERFACE	KAYONZA	MWILI		Bikoki	MW04	Wet	May				no
INTERFACE	KAYONZA	MWILI		Kageyo	MW05	Dry	June	4	Gp	M	yes	yes	Stomoxys	30.6762	-1.8967	Grassland
INTERFACE	KAYONZA	MWILI		Kageyo	MW05	Dry	June	5	Gp	F	yes	yes
INTERFACE	KAYONZA	MWILI		Kageyo	MW05	Dry	June	1	Gmc	M	yes	yes
INTERFACE	KAYONZA	MWILI		Kageyo	MW05	Dry	june	2	Gmc	F	yes	yes
INTERFACE	KAYONZA	MWILI		Kageyo	MW05	Dry	July				no
INTERFACE	KAYONZA	MWILI		Kageyo	MW05	Dry	July	2	Gp	F	yes	no
INTERFACE	KAYONZA	MWILI		Kageyo	MW05	Dry	July				no
INTERFACE	KAYONZA	MWILI		Kageyo	MW05	Dry	July				no
INTERFACE	KAYONZA	MWILI		Kageyo	MW05	Dry	August				no
INTERFACE	KAYONZA	MWILI		Kageyo	MW05	Dry	August				no
INTERFACE	KAYONZA	MWILI		Kageyo	MW05	Dry	August				no
INTERFACE	KAYONZA	MWILI		Kageyo	MW05	Dry	August				no
INTERFACE	KAYONZA	MWILI		Kageyo	MW05	Wet	March	33	Gp	M	yes	yes
INTERFACE	KAYONZA	MWILI		Kageyo	MW05	Wet	March	46	Gp	F	yes	yes
INTERFACE	KAYONZA	MWILI		Kageyo	MW05	Wet	March	21	Gmc	M	yes	yes
INTERFACE	KAYONZA	MWILI		Kageyo	MW05	Wet	March	27	Gmc	F	yes	yes
INTERFACE	KAYONZA	MWILI		Kageyo	MW05	Wet	April	195	Gp	M	yes	yes
INTERFACE	KAYONZA	MWILI		Kageyo	MW05	Wet	April	308	Gp	F	yes	yes
INTERFACE	KAYONZA	MWILI		Kageyo	MW05	Wet	April	84	Gmc	M	yes	yes
INTERFACE	KAYONZA	MWILI		Kageyo	MW05	Wet	April	121	Gmc	F	yes	yes
INTERFACE	KAYONZA	MWILI		Kageyo	MW05	Wet	May	26	Gp	M	yes	yes
INTERFACE	KAYONZA	MWILI		Kageyo	MW05	Wet	May	41	Gp	F	yes	yes
INTERFACE	KAYONZA	MWILI		Kageyo	MW05	Wet	May	12	Gmc	M	yes	yes
INTERFACE	KAYONZA	MWILI		Kageyo	MW05	Wet	May	22	Gmc	F	yes	yes
INTERFACE	KAYONZA	MWILI		Kageyo	MW06	Dry	June				no		Tabanids, Stomoxys	30.6824	-1.94344	Grassland
INTERFACE	KAYONZA	MWILI		Kageyo	MW06	Dry	June	4	Gp	F	yes	no
INTERFACE	KAYONZA	MWILI		Kageyo	MW06	Dry	June				no
INTERFACE	KAYONZA	MWILI		Kageyo	MW06	Dry	june				no
INTERFACE	KAYONZA	MWILI		Kageyo	MW06	Dry	July				no
INTERFACE	KAYONZA	MWILI		Kageyo	MW06	Dry	July				no
INTERFACE	KAYONZA	MWILI		Kageyo	MW06	Dry	July				no
INTERFACE	KAYONZA	MWILI		Kageyo	MW06	Dry	July				no
INTERFACE	KAYONZA	MWILI		Kageyo	MW06	Dry	August	1	Gp	M	yes	no
INTERFACE	KAYONZA	MWILI		Kageyo	MW06	Dry	August				no
INTERFACE	KAYONZA	MWILI		Kageyo	MW06	Dry	August				no
INTERFACE	KAYONZA	MWILI		Kageyo	MW06	Dry	August				no
INTERFACE	KAYONZA	MWILI		Kageyo	MW06	Wet	March	7	Gp	M	yes	yes
INTERFACE	KAYONZA	MWILI		Kageyo	MW06	Wet	March	15	Gp	F	yes	yes
INTERFACE	KAYONZA	MWILI		Kageyo	MW06	Wet	March	1	Gmc	M	yes	yes
INTERFACE	KAYONZA	MWILI		Kageyo	MW06	Wet	March	5	Gmc	F	yes	yes
INTERFACE	KAYONZA	MWILI		Kageyo	MW06	Wet	April	14	Gp	M	yes	yes
INTERFACE	KAYONZA	MWILI		Kageyo	MW06	Wet	April	23	Gp	F	yes	yes
INTERFACE	KAYONZA	MWILI		Kageyo	MW06	Wet	April	3	Gmc	M	yes	yes
INTERFACE	KAYONZA	MWILI		Kageyo	MW06	Wet	April	7	Gmc	F	yes	yes
INTERFACE	KAYONZA	MWILI		Kageyo	MW06	Wet	May	22	Gp	M	yes	yes
INTERFACE	KAYONZA	MWILI		Kageyo	MW06	Wet	May	43	Gp	F	yes	yes
INTERFACE	KAYONZA	MWILI		Kageyo	MW06	Wet	May	6	Gmc	M	yes	yes
INTERFACE	KAYONZA	MWILI		Kageyo	MW06	Wet	May	15	Gmc	F	yes	yes
INTERFACE	KAYONZA	NDEGO		Kiyovu	ND01	Dry	June	5	Gp	M	yes	yes	Stomoxys, Tabanids	30.7034	-1.97903	Woodland
INTERFACE	KAYONZA	NDEGO		Kiyovu	ND01	Dry	June	8	Gp	F	yes	yes
INTERFACE	KAYONZA	NDEGO		Kiyovu	ND01	Dry	June				no
INTERFACE	KAYONZA	NDEGO		Kiyovu	ND01	Dry	june	2	Gmc	F	yes	yes
INTERFACE	KAYONZA	NDEGO		Kiyovu	ND01	Dry	July	2	Gp	M	yes	yes
INTERFACE	KAYONZA	NDEGO		Kiyovu	ND01	Dry	July	7	Gp	F	yes	yes
INTERFACE	KAYONZA	NDEGO		Kiyovu	ND01	Dry	July				no
INTERFACE	KAYONZA	NDEGO		Kiyovu	ND01	Dry	July	1	Gmc	F	yes	yes
INTERFACE	KAYONZA	NDEGO		Kiyovu	ND01	Dry	August	3	Gp	M	yes	no
INTERFACE	KAYONZA	NDEGO		Kiyovu	ND01	Dry	August	6	Gp	F	yes	no
INTERFACE	KAYONZA	NDEGO		Kiyovu	ND01	Dry	August				no
INTERFACE	KAYONZA	NDEGO		Kiyovu	ND01	Dry	August				no
INTERFACE	KAYONZA	NDEGO		Kiyovu	ND01	Wet	March	6	Gp	M	yes	yes
INTERFACE	KAYONZA	NDEGO		Kiyovu	ND01	Wet	March	11	Gp	F	yes	yes
INTERFACE	KAYONZA	NDEGO		Kiyovu	ND01	Wet	March	1	Gmc	M	yes	yes
INTERFACE	KAYONZA	NDEGO		Kiyovu	ND01	Wet	March	8	Gmc	F	yes	yes
INTERFACE	KAYONZA	NDEGO		Kiyovu	ND01	Wet	April	12	Gp	M	yes	yes
INTERFACE	KAYONZA	NDEGO		Kiyovu	ND01	Wet	April	29	Gp	F	yes	yes
INTERFACE	KAYONZA	NDEGO		Kiyovu	ND01	Wet	April	6	Gmc	M	yes	yes
INTERFACE	KAYONZA	NDEGO		Kiyovu	ND01	Wet	April	12	Gmc	F	yes	yes
INTERFACE	KAYONZA	NDEGO		Kiyovu	ND01	Wet	May	9	Gp	M	yes	yes
INTERFACE	KAYONZA	NDEGO		Kiyovu	ND01	Wet	May	20	Gp	F	yes	yes
INTERFACE	KAYONZA	NDEGO		Kiyovu	ND01	Wet	May	1	Gmc	M	yes	yes
INTERFACE	KAYONZA	NDEGO		Kiyovu	ND01	Wet	May	4	Gmc	F	yes	yes
INTERFACE	KAYONZA	NDEGO		Kiyovu	ND02	Dry	June				no		Stomoxys	30.7333	-1.99718	Grassland
INTERFACE	KAYONZA	NDEGO		Kiyovu	ND02	Dry	June				no
INTERFACE	KAYONZA	NDEGO		Kiyovu	ND02	Dry	June				no
INTERFACE	KAYONZA	NDEGO		Kiyovu	ND02	Dry	june				no
INTERFACE	KAYONZA	NDEGO		Kiyovu	ND02	Dry	July				no
INTERFACE	KAYONZA	NDEGO		Kiyovu	ND02	Dry	July				no
INTERFACE	KAYONZA	NDEGO		Kiyovu	ND02	Dry	July				no
INTERFACE	KAYONZA	NDEGO		Kiyovu	ND02	Dry	July				no
INTERFACE	KAYONZA	NDEGO		Kiyovu	ND02	Dry	August				no
INTERFACE	KAYONZA	NDEGO		Kiyovu	ND02	Dry	August				no
INTERFACE	KAYONZA	NDEGO		Kiyovu	ND02	Dry	August				no
INTERFACE	KAYONZA	NDEGO		Kiyovu	ND02	Dry	August				no
INTERFACE	KAYONZA	NDEGO		Kiyovu	ND02	Wet	March				no
INTERFACE	KAYONZA	NDEGO		Kiyovu	ND02	Wet	March				no
INTERFACE	KAYONZA	NDEGO		Kiyovu	ND02	Wet	March				no
INTERFACE	KAYONZA	NDEGO		Kiyovu	ND02	Wet	March				no
INTERFACE	KAYONZA	NDEGO		Kiyovu	ND02	Wet	April				no
INTERFACE	KAYONZA	NDEGO		Kiyovu	ND02	Wet	April				no
INTERFACE	KAYONZA	NDEGO		Kiyovu	ND02	Wet	April				no
INTERFACE	KAYONZA	NDEGO		Kiyovu	ND02	Wet	April				no
INTERFACE	KAYONZA	NDEGO		Kiyovu	ND02	Wet	May				no
INTERFACE	KAYONZA	NDEGO		Kiyovu	ND02	Wet	May				no
INTERFACE	KAYONZA	NDEGO		Kiyovu	ND02	Wet	May				no
INTERFACE	KAYONZA	NDEGO		Kiyovu	ND02	Wet	May				no
INTERFACE	KAYONZA	NDEGO		Kiyovu	ND03	Dry	June	4	Gp	M	yes	yes	Stomoxys	30.7424	-1.9631	Woodland
INTERFACE	KAYONZA	NDEGO		Kiyovu	ND03	Dry	June	7	Gp	F	yes	yes
INTERFACE	KAYONZA	NDEGO		Kiyovu	ND03	Dry	June	1	Gmc	M	yes	yes
INTERFACE	KAYONZA	NDEGO		Kiyovu	ND03	Dry	june	3	Gmc	F	yes	yes
INTERFACE	KAYONZA	NDEGO		Kiyovu	ND03	Dry	July	4	Gp	M	yes	yes
INTERFACE	KAYONZA	NDEGO		Kiyovu	ND03	Dry	July	8	Gp	F	yes	yes
INTERFACE	KAYONZA	NDEGO		Kiyovu	ND03	Dry	July	1	Gmc	M	yes	yes
INTERFACE	KAYONZA	NDEGO		Kiyovu	ND03	Dry	July	6	Gmc	F	yes	yes
INTERFACE	KAYONZA	NDEGO		Kiyovu	ND03	Dry	August	2	Gp	M	yes	yes
INTERFACE	KAYONZA	NDEGO		Kiyovu	ND03	Dry	August	4	Gp	F	yes	yes
INTERFACE	KAYONZA	NDEGO		Kiyovu	ND03	Dry	August				no
INTERFACE	KAYONZA	NDEGO		Kiyovu	ND03	Dry	August	1	Gmc	F	yes	yes
INTERFACE	KAYONZA	NDEGO		Kiyovu	ND03	Wet	March	7	Gp	M	yes	yes
INTERFACE	KAYONZA	NDEGO		Kiyovu	ND03	Wet	March	10	Gp	F	yes	yes
INTERFACE	KAYONZA	NDEGO		Kiyovu	ND03	Wet	March	1	Gmc	M	yes	yes
INTERFACE	KAYONZA	NDEGO		Kiyovu	ND03	Wet	March	3	Gmc	F	yes	yes
INTERFACE	KAYONZA	NDEGO		Kiyovu	ND03	Wet	April	39	Gp	M	yes	yes
INTERFACE	KAYONZA	NDEGO		Kiyovu	ND03	Wet	April	62	Gp	F	yes	yes
INTERFACE	KAYONZA	NDEGO		Kiyovu	ND03	Wet	April	15	Gmc	M	yes	yes
INTERFACE	KAYONZA	NDEGO		Kiyovu	ND03	Wet	April	26	Gmc	F	yes	yes
INTERFACE	KAYONZA	NDEGO		Kiyovu	ND03	Wet	May	17	Gp	M	yes	yes
INTERFACE	KAYONZA	NDEGO		Kiyovu	ND03	Wet	May	28	Gp	F	yes	yes
INTERFACE	KAYONZA	NDEGO		Kiyovu	ND03	Wet	May	24	Gmc	M	yes	yes
INTERFACE	KAYONZA	NDEGO		Kiyovu	ND03	Wet	May	33	Gmc	F	yes	yes
INTERFACE	KAYONZA	NDEGO		Nasho	ND04	Dry	June				no		Stomoxys	30.7686	-1.97117	Lacustrine
INTERFACE	KAYONZA	NDEGO		Nasho	ND04	Dry	June				no
INTERFACE	KAYONZA	NDEGO		Nasho	ND04	Dry	June				no
INTERFACE	KAYONZA	NDEGO		Nasho	ND04	Dry	june				no
INTERFACE	KAYONZA	NDEGO		Nasho	ND04	Dry	July				no
INTERFACE	KAYONZA	NDEGO		Nasho	ND04	Dry	July				no
INTERFACE	KAYONZA	NDEGO		Nasho	ND04	Dry	July				no
INTERFACE	KAYONZA	NDEGO		Nasho	ND04	Dry	July				no
INTERFACE	KAYONZA	NDEGO		Nasho	ND04	Dry	August				no
INTERFACE	KAYONZA	NDEGO		Nasho	ND04	Dry	August				no
INTERFACE	KAYONZA	NDEGO		Nasho	ND04	Dry	August				no
INTERFACE	KAYONZA	NDEGO		Nasho	ND04	Dry	August				no
INTERFACE	KAYONZA	NDEGO		Nasho	ND04	Wet	March				no
INTERFACE	KAYONZA	NDEGO		Nasho	ND04	Wet	March				no
INTERFACE	KAYONZA	NDEGO		Nasho	ND04	Wet	March				no
INTERFACE	KAYONZA	NDEGO		Nasho	ND04	Wet	March				no
INTERFACE	KAYONZA	NDEGO		Nasho	ND04	Wet	April				no
INTERFACE	KAYONZA	NDEGO		Nasho	ND04	Wet	April				no
INTERFACE	KAYONZA	NDEGO		Nasho	ND04	Wet	April				no
INTERFACE	KAYONZA	NDEGO		Nasho	ND04	Wet	April				no
INTERFACE	KAYONZA	NDEGO		Nasho	ND04	Wet	May				no
INTERFACE	KAYONZA	NDEGO		Nasho	ND04	Wet	May				no
INTERFACE	KAYONZA	NDEGO		Nasho	ND04	Wet	May				no
INTERFACE	KAYONZA	NDEGO		Nasho	ND04	Wet	May				no
INTERFACE	KAYONZA	NDEGO		Kwisi	ND05	Dry	June				no		Stomoxys, Tabanids	30.7662	-1.93685	Woodland
INTERFACE	KAYONZA	NDEGO		Kwisi	ND05	Dry	June				no
INTERFACE	KAYONZA	NDEGO		Kwisi	ND05	Dry	June				no
INTERFACE	KAYONZA	NDEGO		Kwisi	ND05	Dry	june				no
INTERFACE	KAYONZA	NDEGO		Kwisi	ND05	Dry	July				no
INTERFACE	KAYONZA	NDEGO		Kwisi	ND05	Dry	July				no
INTERFACE	KAYONZA	NDEGO		Kwisi	ND05	Dry	July				no
INTERFACE	KAYONZA	NDEGO		Kwisi	ND05	Dry	July				no
INTERFACE	KAYONZA	NDEGO		Kwisi	ND05	Dry	August				no
INTERFACE	KAYONZA	NDEGO		Kwisi	ND05	Dry	August				no
INTERFACE	KAYONZA	NDEGO		Kwisi	ND05	Dry	August				no
INTERFACE	KAYONZA	NDEGO		Kwisi	ND05	Dry	August				no
INTERFACE	KAYONZA	NDEGO		Kwisi	ND05	Wet	March	2	Gp	M	yes	no
INTERFACE	KAYONZA	NDEGO		Kwisi	ND05	Wet	March	3	Gp	F	yes	no
INTERFACE	KAYONZA	NDEGO		Kwisi	ND05	Wet	March				no
INTERFACE	KAYONZA	NDEGO		Kwisi	ND05	Wet	March				no
INTERFACE	KAYONZA	NDEGO		Kwisi	ND05	Wet	April	4	Gp	M	yes	yes
INTERFACE	KAYONZA	NDEGO		Kwisi	ND05	Wet	April	5	Gp	F	yes	yes
INTERFACE	KAYONZA	NDEGO		Kwisi	ND05	Wet	April	1	Gmc	M	yes	yes
INTERFACE	KAYONZA	NDEGO		Kwisi	ND05	Wet	April	1	Gmc	F	yes	yes
INTERFACE	KAYONZA	NDEGO		Kwisi	ND05	Wet	May	3	Gp	M	yes	no
INTERFACE	KAYONZA	NDEGO		Kwisi	ND05	Wet	May				no
INTERFACE	KAYONZA	NDEGO		Kwisi	ND05	Wet	May				no
INTERFACE	KAYONZA	NDEGO		Kwisi	ND05	Wet	May				no
INTERFACE	KAYONZA	NDEGO		Nasho	ND06	Dry	June				no		Stomoxys, Tabanids	30.7983	-1.94001	Lacustrine
INTERFACE	KAYONZA	NDEGO		Nasho	ND06	Dry	June				no
INTERFACE	KAYONZA	NDEGO		Nasho	ND06	Dry	June				no
INTERFACE	KAYONZA	NDEGO		Nasho	ND06	Dry	june				no
INTERFACE	KAYONZA	NDEGO		Nasho	ND06	Dry	July				no
INTERFACE	KAYONZA	NDEGO		Nasho	ND06	Dry	July				no
INTERFACE	KAYONZA	NDEGO		Nasho	ND06	Dry	July				no
INTERFACE	KAYONZA	NDEGO		Nasho	ND06	Dry	July				no
INTERFACE	KAYONZA	NDEGO		Nasho	ND06	Dry	August				no
INTERFACE	KAYONZA	NDEGO		Nasho	ND06	Dry	August				no
INTERFACE	KAYONZA	NDEGO		Nasho	ND06	Dry	August				no
INTERFACE	KAYONZA	NDEGO		Nasho	ND06	Dry	August				no
INTERFACE	KAYONZA	NDEGO		Nasho	ND06	Wet	March				no
INTERFACE	KAYONZA	NDEGO		Nasho	ND06	Wet	March				no
INTERFACE	KAYONZA	NDEGO		Nasho	ND06	Wet	March				no
INTERFACE	KAYONZA	NDEGO		Nasho	ND06	Wet	March				no
INTERFACE	KAYONZA	NDEGO		Nasho	ND06	Wet	April				no
INTERFACE	KAYONZA	NDEGO		Nasho	ND06	Wet	April				no
INTERFACE	KAYONZA	NDEGO		Nasho	ND06	Wet	April				no
INTERFACE	KAYONZA	NDEGO		Nasho	ND06	Wet	April				no
INTERFACE	KAYONZA	NDEGO		Nasho	ND06	Wet	May				no
INTERFACE	KAYONZA	NDEGO		Nasho	ND06	Wet	May				no
INTERFACE	KAYONZA	NDEGO		Nasho	ND06	Wet	May				no
INTERFACE	KAYONZA	NDEGO		Nasho	ND06	Wet	May				no
INTERFACE	KAYONZA	NDEGO		Kwisi	ND07	Dry	June				no		Stomoxys	30.7854	-1.91589	Woodland
INTERFACE	KAYONZA	NDEGO		Kwisi	ND07	Dry	June				no
INTERFACE	KAYONZA	NDEGO		Kwisi	ND07	Dry	June				no
INTERFACE	KAYONZA	NDEGO		Kwisi	ND07	Dry	june				no
INTERFACE	KAYONZA	NDEGO		Kwisi	ND07	Dry	July				no
INTERFACE	KAYONZA	NDEGO		Kwisi	ND07	Dry	July				no
INTERFACE	KAYONZA	NDEGO		Kwisi	ND07	Dry	July				no
INTERFACE	KAYONZA	NDEGO		Kwisi	ND07	Dry	July				no
INTERFACE	KAYONZA	NDEGO		Kwisi	ND07	Dry	August				no
INTERFACE	KAYONZA	NDEGO		Kwisi	ND07	Dry	August				no
INTERFACE	KAYONZA	NDEGO		Kwisi	ND07	Dry	August				no
INTERFACE	KAYONZA	NDEGO		Kwisi	ND07	Dry	August				no
INTERFACE	KAYONZA	NDEGO		Kwisi	ND07	Wet	March				no
INTERFACE	KAYONZA	NDEGO		Kwisi	ND07	Wet	March				no
INTERFACE	KAYONZA	NDEGO		Kwisi	ND07	Wet	March				no
INTERFACE	KAYONZA	NDEGO		Kwisi	ND07	Wet	March				no
INTERFACE	KAYONZA	NDEGO		Kwisi	ND07	Wet	April	1	Gp	M	yes	yes
INTERFACE	KAYONZA	NDEGO		Kwisi	ND07	Wet	April	5	Gp	F	yes	yes
INTERFACE	KAYONZA	NDEGO		Kwisi	ND07	Wet	April				no
INTERFACE	KAYONZA	NDEGO		Kwisi	ND07	Wet	April	1	Gmc	F	yes	yes
INTERFACE	KAYONZA	NDEGO		Kwisi	ND07	Wet	May				no
INTERFACE	KAYONZA	NDEGO		Kwisi	ND07	Wet	May				no
INTERFACE	KAYONZA	NDEGO		Kwisi	ND07	Wet	May				no
INTERFACE	KAYONZA	NDEGO		Kwisi	ND07	Wet	May				no
INTERFACE	KAYONZA	NDEGO		Nasho	ND08	Dry	June				no		Stomoxys, Tabanids	30.7792	-2.01023	Lacustrine
INTERFACE	KAYONZA	NDEGO		Nasho	ND08	Dry	June				no
INTERFACE	KAYONZA	NDEGO		Nasho	ND08	Dry	June				no
INTERFACE	KAYONZA	NDEGO		Nasho	ND08	Dry	june				no
INTERFACE	KAYONZA	NDEGO		Nasho	ND08	Dry	July				no
INTERFACE	KAYONZA	NDEGO		Nasho	ND08	Dry	July				no
INTERFACE	KAYONZA	NDEGO		Nasho	ND08	Dry	July				no
INTERFACE	KAYONZA	NDEGO		Nasho	ND08	Dry	July				no
INTERFACE	KAYONZA	NDEGO		Nasho	ND08	Dry	August				no
INTERFACE	KAYONZA	NDEGO		Nasho	ND08	Dry	August				no
INTERFACE	KAYONZA	NDEGO		Nasho	ND08	Dry	August				no
INTERFACE	KAYONZA	NDEGO		Nasho	ND08	Dry	August				no
INTERFACE	KAYONZA	NDEGO		Nasho	ND08	Wet	March				no
INTERFACE	KAYONZA	NDEGO		Nasho	ND08	Wet	March				no
INTERFACE	KAYONZA	NDEGO		Nasho	ND08	Wet	March				no
INTERFACE	KAYONZA	NDEGO		Nasho	ND08	Wet	March				no
INTERFACE	KAYONZA	NDEGO		Nasho	ND08	Wet	April				no
INTERFACE	KAYONZA	NDEGO		Nasho	ND08	Wet	April				no
INTERFACE	KAYONZA	NDEGO		Nasho	ND08	Wet	April				no
INTERFACE	KAYONZA	NDEGO		Nasho	ND08	Wet	April				no
INTERFACE	KAYONZA	NDEGO		Nasho	ND08	Wet	May				no
INTERFACE	KAYONZA	NDEGO		Nasho	ND08	Wet	May				no
INTERFACE	KAYONZA	NDEGO		Nasho	ND08	Wet	May				no
INTERFACE	KAYONZA	NDEGO		Nasho	ND08	Wet	May				no
INTERFACE	KAYONZA	NDEGO		Kwisi	ND09	Dry	June				no		Stomoxys	30.8016	-1.90275	Woodland
INTERFACE	KAYONZA	NDEGO		Kwisi	ND09	Dry	June	2	Gp	F	yes	no
INTERFACE	KAYONZA	NDEGO		Kwisi	ND09	Dry	June				no
INTERFACE	KAYONZA	NDEGO		Kwisi	ND09	Dry	june				no
INTERFACE	KAYONZA	NDEGO		Kwisi	ND09	Dry	July				no
INTERFACE	KAYONZA	NDEGO		Kwisi	ND09	Dry	July				no
INTERFACE	KAYONZA	NDEGO		Kwisi	ND09	Dry	July				no
INTERFACE	KAYONZA	NDEGO		Kwisi	ND09	Dry	July				no
INTERFACE	KAYONZA	NDEGO		Kwisi	ND09	Dry	August				no
INTERFACE	KAYONZA	NDEGO		Kwisi	ND09	Dry	August				no
INTERFACE	KAYONZA	NDEGO		Kwisi	ND09	Dry	August				no
INTERFACE	KAYONZA	NDEGO		Kwisi	ND09	Dry	August				no
INTERFACE	KAYONZA	NDEGO		Kwisi	ND09	Wet	March	2	Gp	M	yes	no
INTERFACE	KAYONZA	NDEGO		Kwisi	ND09	Wet	March	6	Gp	F	yes	no
INTERFACE	KAYONZA	NDEGO		Kwisi	ND09	Wet	March				no
INTERFACE	KAYONZA	NDEGO		Kwisi	ND09	Wet	March				no
INTERFACE	KAYONZA	NDEGO		Kwisi	ND09	Wet	April	6	Gp	M	yes	yes
INTERFACE	KAYONZA	NDEGO		Kwisi	ND09	Wet	April	11	Gp	F	yes	yes
INTERFACE	KAYONZA	NDEGO		Kwisi	ND09	Wet	April				no
INTERFACE	KAYONZA	NDEGO		Kwisi	ND09	Wet	April	2	Gmc	F	yes	yes
INTERFACE	KAYONZA	NDEGO		Kwisi	ND09	Wet	May	4	Gp	M	yes	no
INTERFACE	KAYONZA	NDEGO		Kwisi	ND09	Wet	May	10	Gp	F	yes	no
INTERFACE	KAYONZA	NDEGO		Kwisi	ND09	Wet	May				no
INTERFACE	KAYONZA	NDEGO		Kwisi	ND09	Wet	May				no
INTERFACE	KAYONZA	NDEGO		Nasho	ND09	Dry	June				no		Stomoxys	30.8054	-1.97521	Lacustrine
INTERFACE	KAYONZA	NDEGO		Nasho	ND10	Dry	June				no
INTERFACE	KAYONZA	NDEGO		Nasho	ND10	Dry	June				no
INTERFACE	KAYONZA	NDEGO		Nasho	ND10	Dry	june				no
INTERFACE	KAYONZA	NDEGO		Nasho	ND10	Dry	July				no
INTERFACE	KAYONZA	NDEGO		Nasho	ND10	Dry	July				no
INTERFACE	KAYONZA	NDEGO		Nasho	ND10	Dry	July				no
INTERFACE	KAYONZA	NDEGO		Nasho	ND10	Dry	July				no
INTERFACE	KAYONZA	NDEGO		Nasho	ND10	Dry	August				no
INTERFACE	KAYONZA	NDEGO		Nasho	ND10	Dry	August				no
INTERFACE	KAYONZA	NDEGO		Nasho	ND10	Dry	August				no
INTERFACE	KAYONZA	NDEGO		Nasho	ND10	Dry	August				no
INTERFACE	KAYONZA	NDEGO		Nasho	ND10	Wet	March				no
INTERFACE	KAYONZA	NDEGO		Nasho	ND10	Wet	March				no
INTERFACE	KAYONZA	NDEGO		Nasho	ND10	Wet	March				no
INTERFACE	KAYONZA	NDEGO		Nasho	ND10	Wet	March				no
INTERFACE	KAYONZA	NDEGO		Nasho	ND10	Wet	April				no
INTERFACE	KAYONZA	NDEGO		Nasho	ND10	Wet	April				no
INTERFACE	KAYONZA	NDEGO		Nasho	ND10	Wet	April				no
INTERFACE	KAYONZA	NDEGO		Nasho	ND10	Wet	April				no
INTERFACE	KAYONZA	NDEGO		Nasho	ND10	Wet	May				no
INTERFACE	KAYONZA	NDEGO		Nasho	ND10	Wet	May				no
INTERFACE	KAYONZA	NDEGO		Nasho	ND10	Wet	May				no
INTERFACE	KAYONZA	NDEGO		Nasho	ND10	Wet	May				no
								39516
			AD= Apparent Density per Trap
			Gp= Glossina pallidipes
			Gmc = Glossina morsitans centralis
			M = Male
			F= Female
			No. = Number
			District and sectors are not applicable for the park
			Ecosystems are not applicable for the interface
			Columns N,O,P and Q apply for the whole site
			Empty spaces (missing values) for columns I, J and K stand for zero fly catch

## Sheet: AD calculation
			Calculation of the Apparent Densities presented in the manuscript
					Sites	Traps/site	Months	Days/month	FACTOR= (Sites × Traps per site × Months x Days per month)	Total	Apparent Density
		1	Area	Akagera NP	12	2	6	6	864	29019	33.5868
				Interface	43	2	6	6	3096	10497	3.3905
		2	Species		Sites	Traps/ site	Months	Days per month	FACTOR= (Sites × Traps per site × Months x Days per month)	Total	Apparent Density
				Applies for each species	55	2	6	6	3960
				G.morsitans centralis						10395	2.625
				G.pallidipes						29121	7.35379
		3	Seasons		Sites	Traps/site	Months	Days/month	FACTOR= (Sites × Traps per site × Months x Days per month)	Total	Apparent Density
				Applies for each season	55	2	3	6	1980
				Dry						8221	4.15202
				Wet						31295	15.8056
		4	Months		Sites	Traps/site	Days/month	Month	FACTOR= (Sites × Traps per site x Days per month)	Total	Apparent Density
				Applies for each month	55	2	6		660
				March						5669	8.58939
				April						18494	28.0212
				May						7132	10.8061
				June						3575	5.41667
				July						2688	4.07273
				August						1958	2.96667
		5	Districts		Sites	Traps/site	Months	Days/month	FACTOR= (Sites × Traps per site × Months x Days per month)	Total	Apparent Density
				Kayonza	26	2	6	6	1872	2266	1.21047
				Gatsibo	7	2	6	6	504	178	0.353175
				Nyagatare	10	2	6	6	720	8053	11.1847
		6	Ecosystem		Sites	Traps/site	Months	Days/month	FACTOR= (Sites × Traps per site × Months x Days per month)	Total	Apparent Density
				Applies for each ecosystem	4	2	6	6	288
				Mountain						7304	25.4
				Savannah						1811	6.3
				Swampy						19904	69.1
